# Supplementary material
Source: Research Square preprint supplement (doi:10.21203/rs.3.rs-9942608/v1)

**Supplementary Data S1: Seismic record section, travel-time fitting, and ray-tracing figures of profiles p300 and p400.**

**Captions:** Seismic record section, travel-time fitting, and ray-tracing of each station in profiles p300 and p400. (a) Calculated travel-time superimposed on seismic record section. The red dots mark the calculated refraction arrivals while the blue dots show the calculated reflection arrivals. Pg: Crustal refraction wave; PmP: Moho reflection wave; Pn: Upper mantle refraction wave. (b) Raytracing superimposed on velocity model. Station number is shown as bold black above the station. Model plotted as in Figs. 2 & S5.

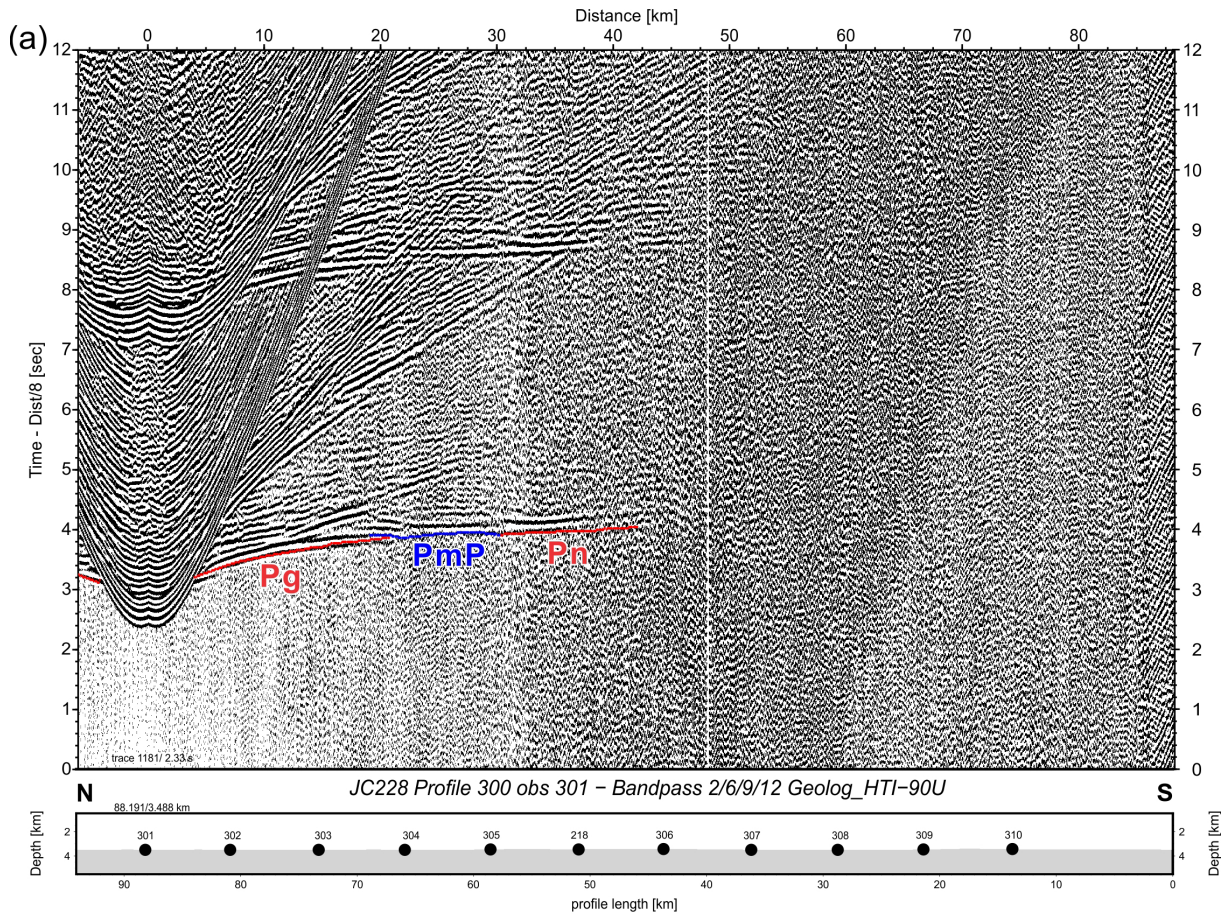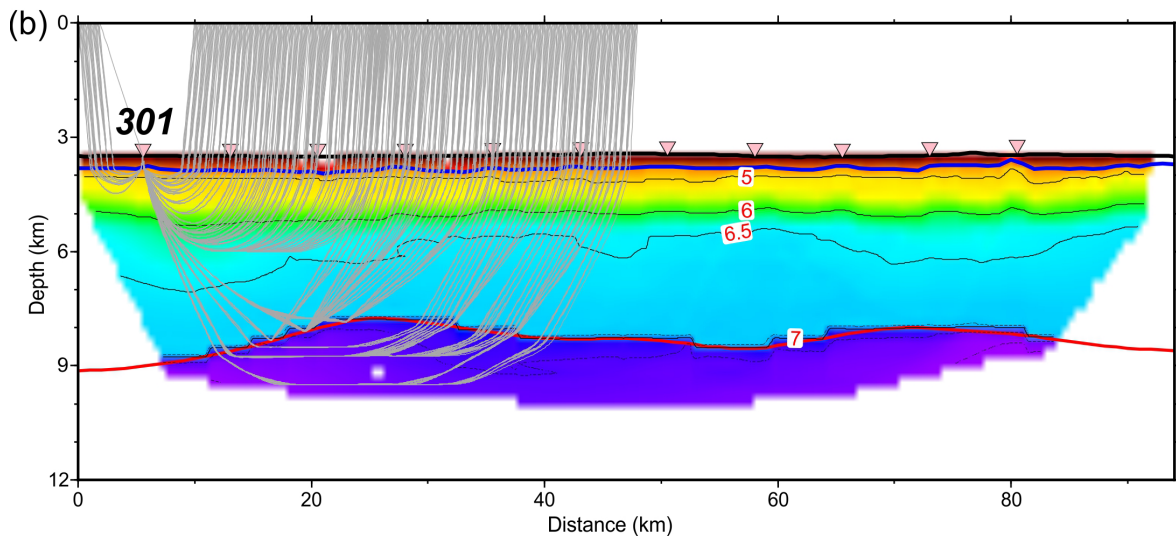

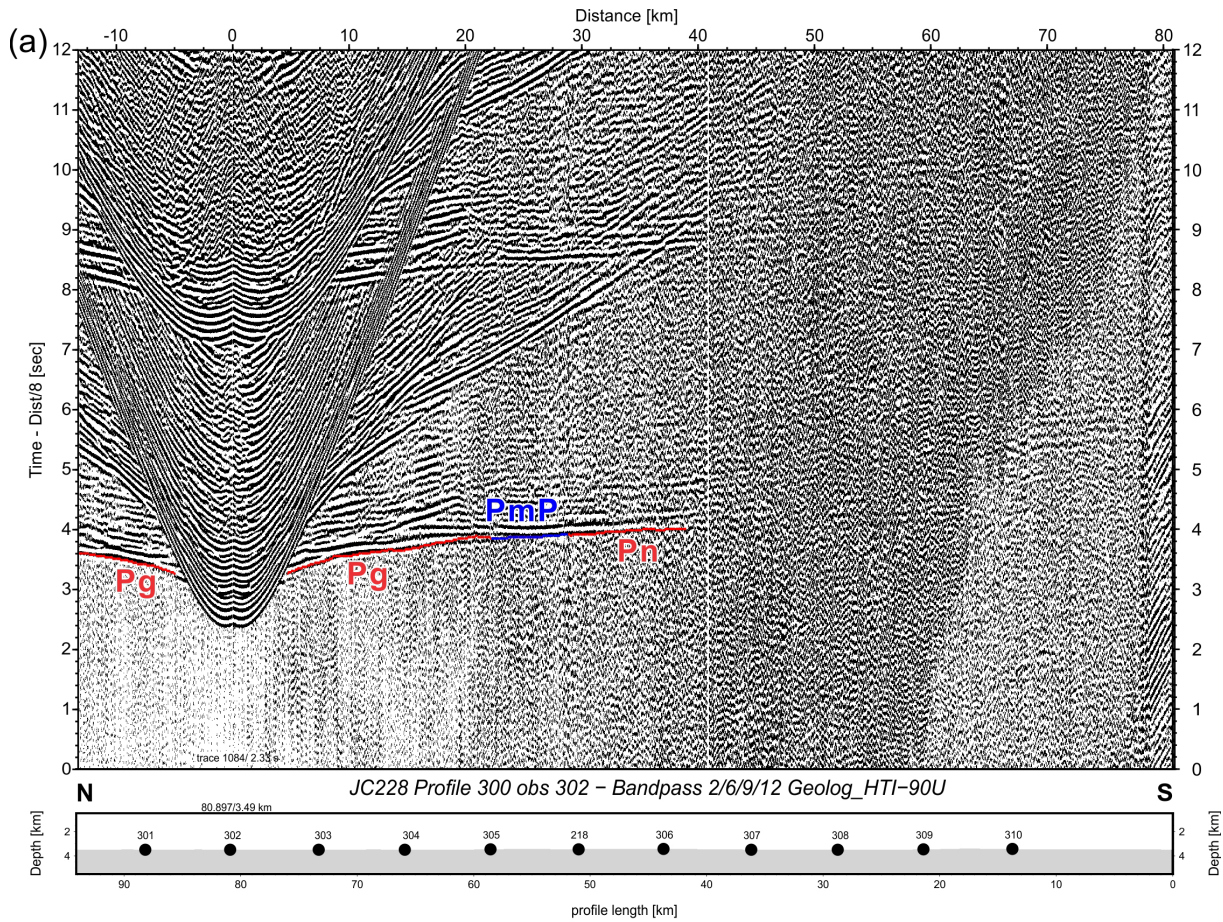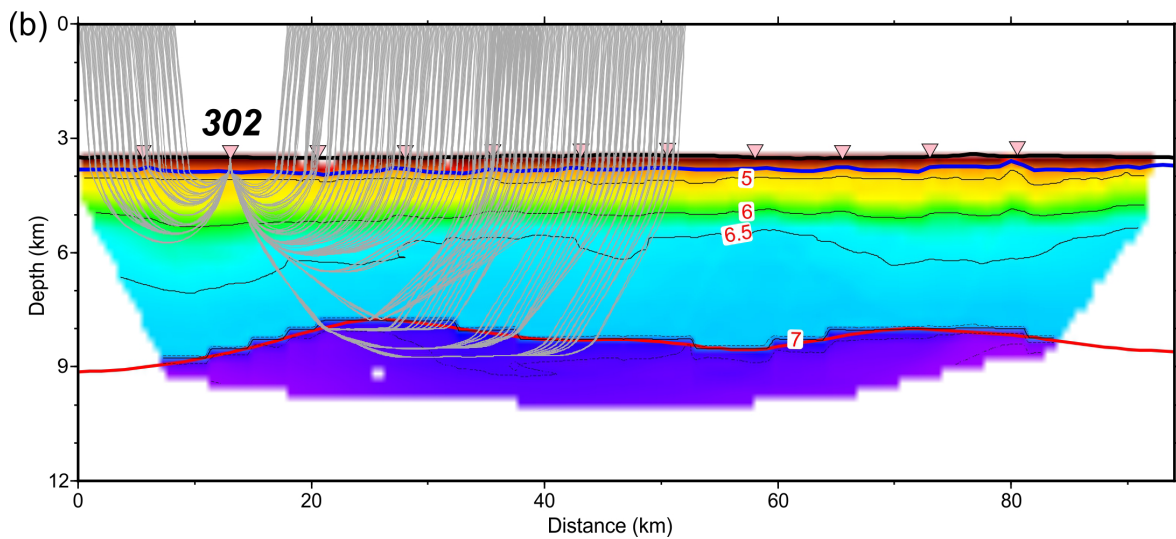

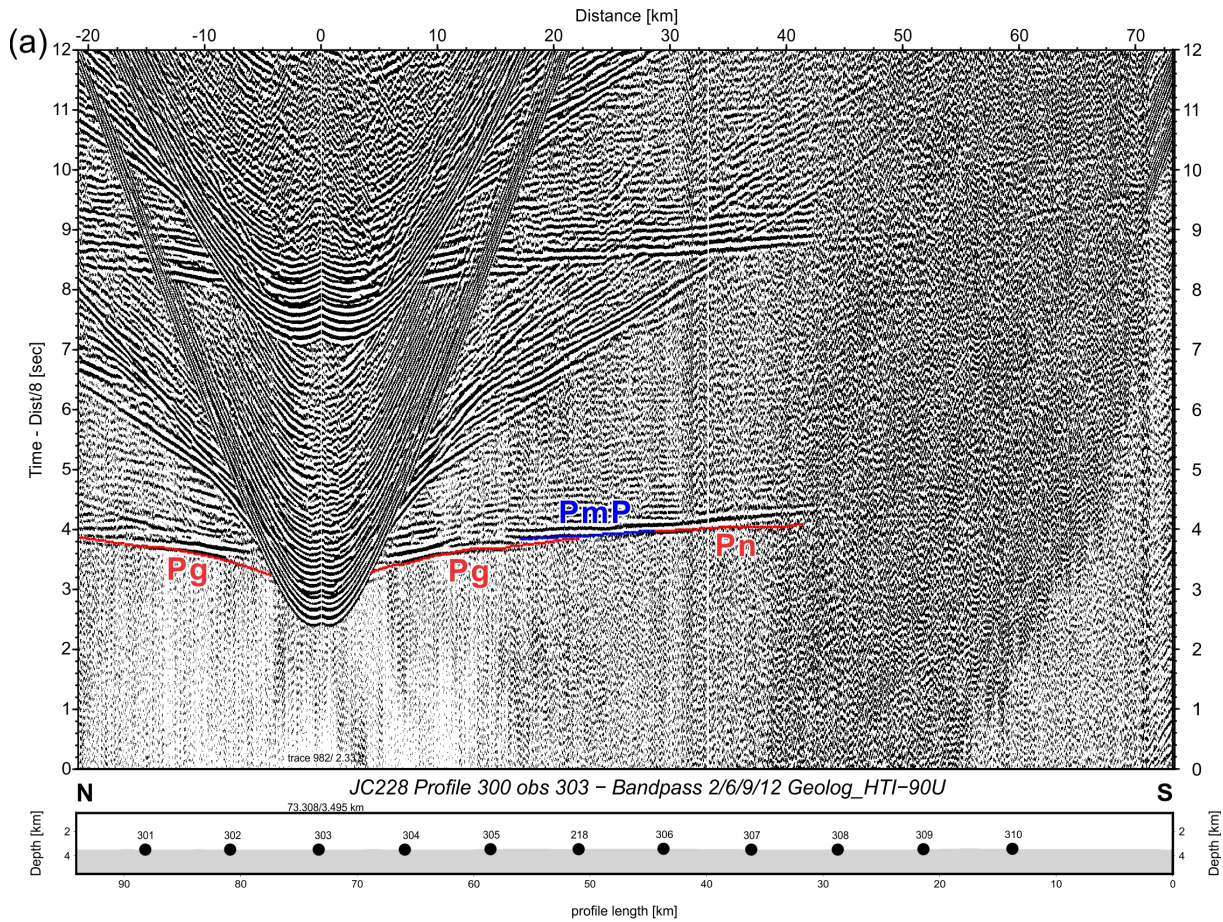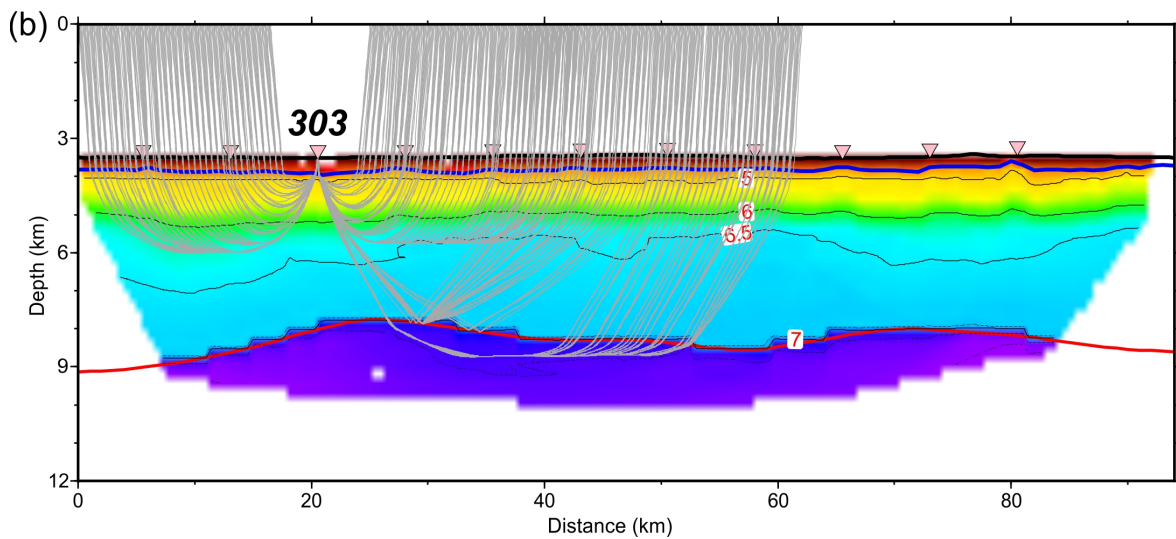

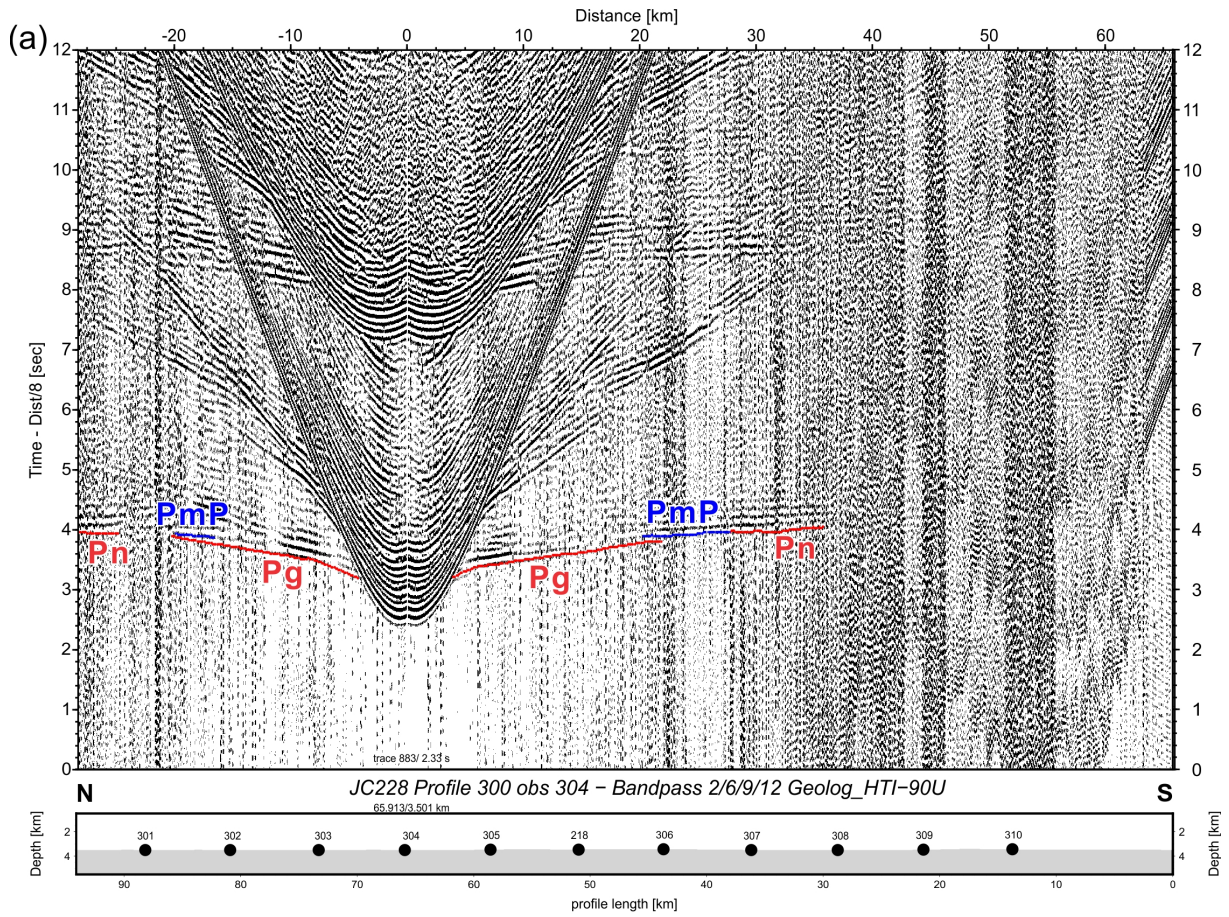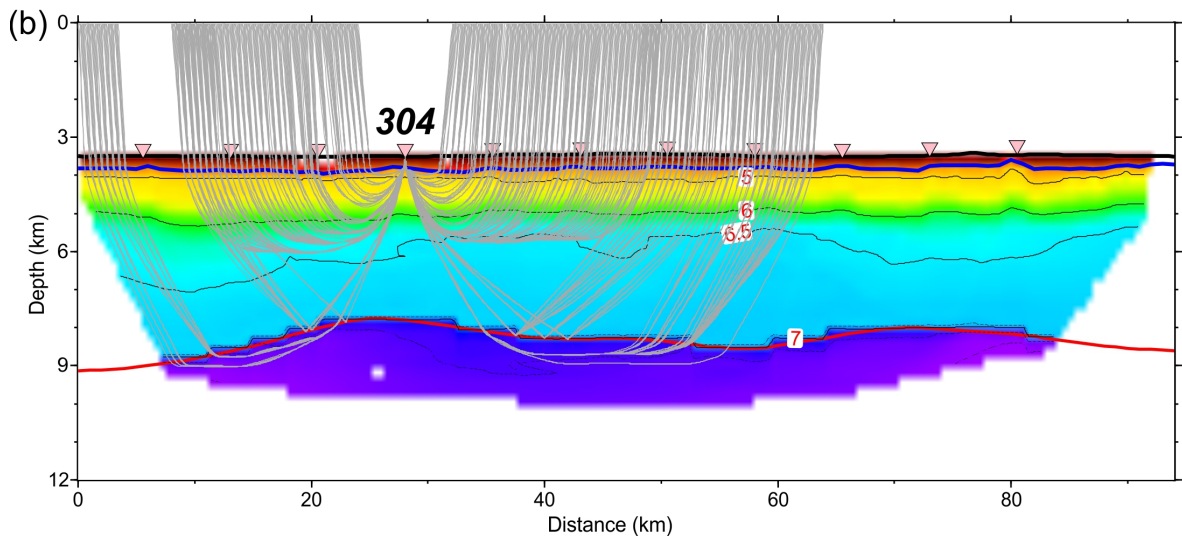

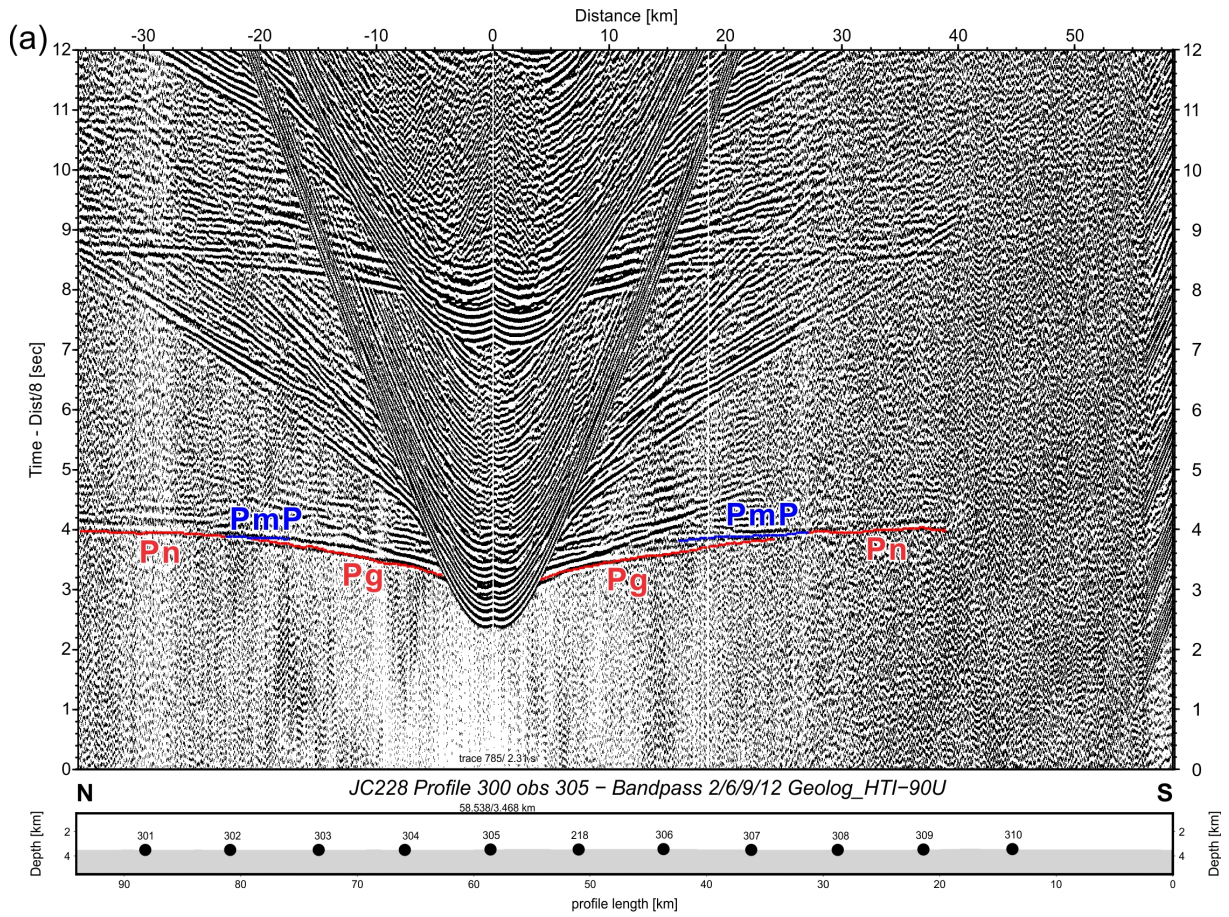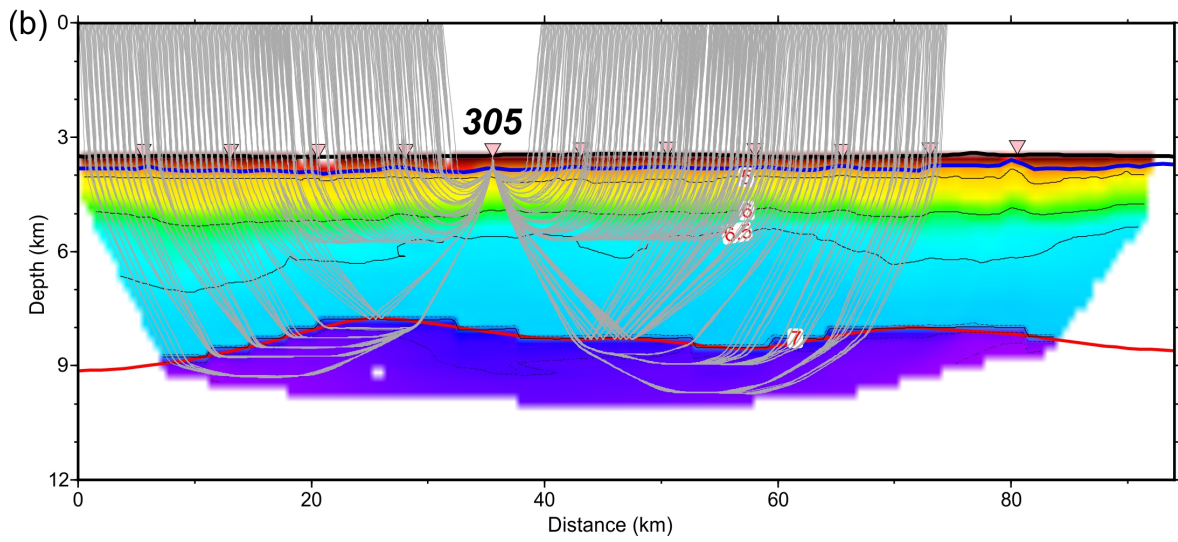

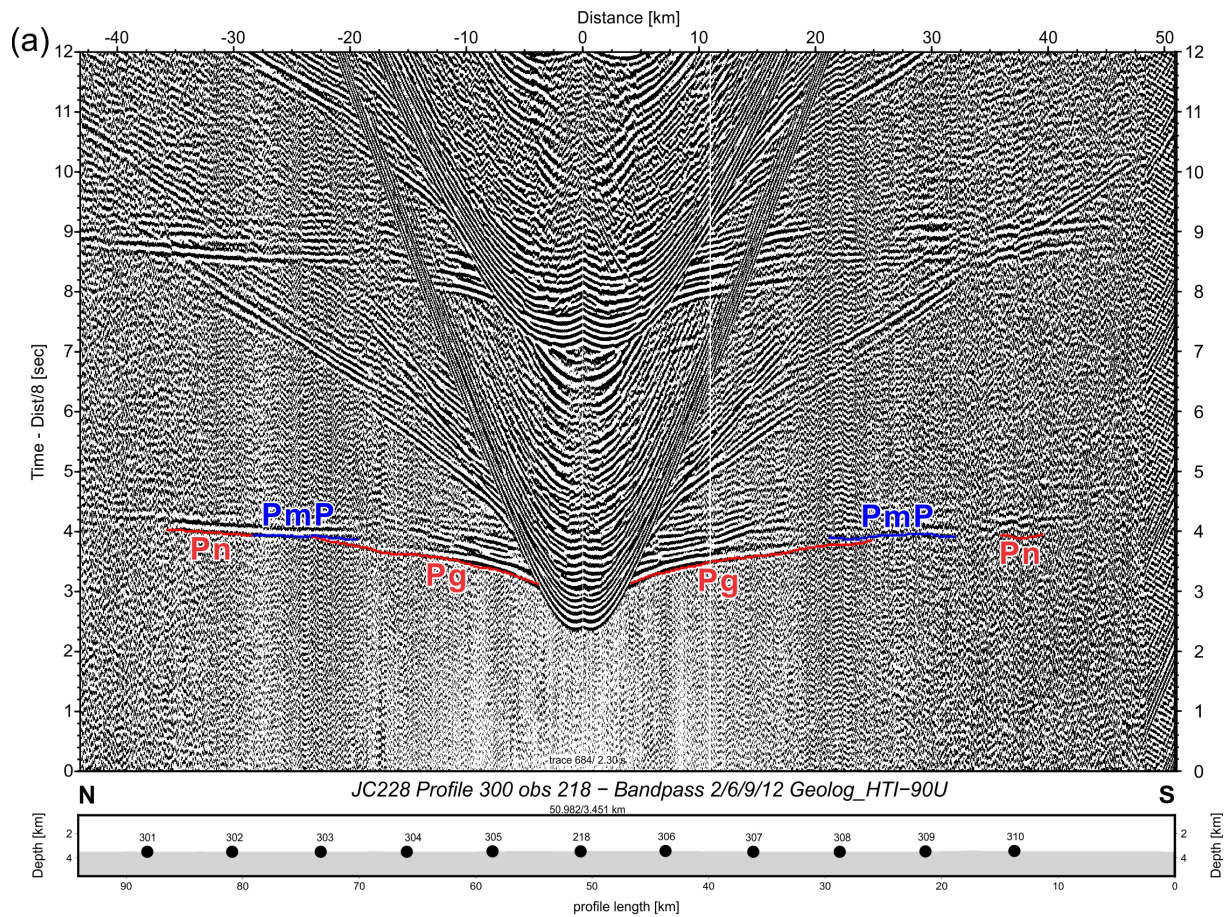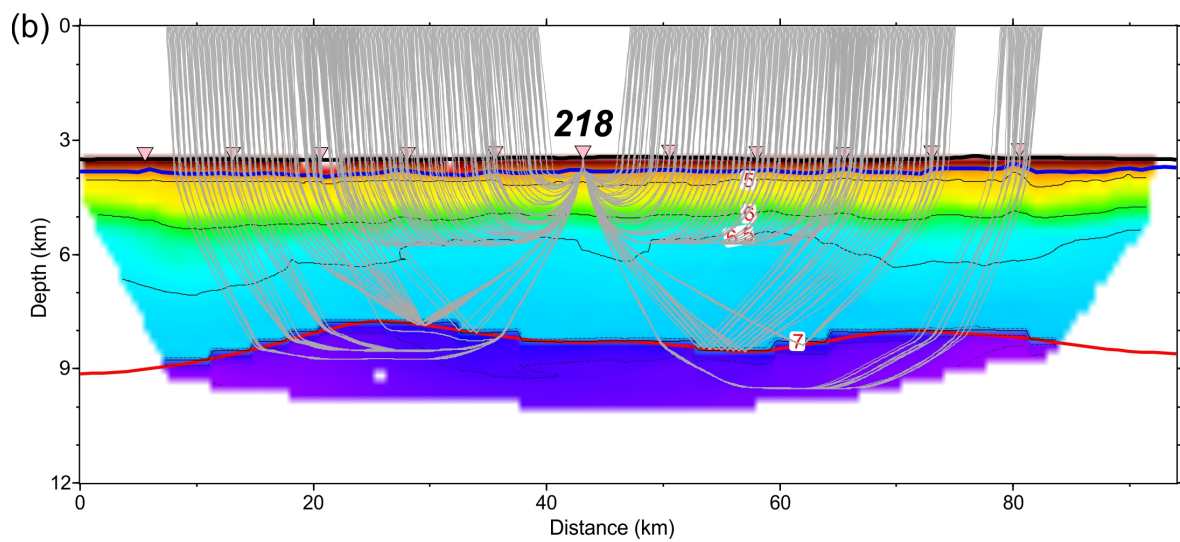

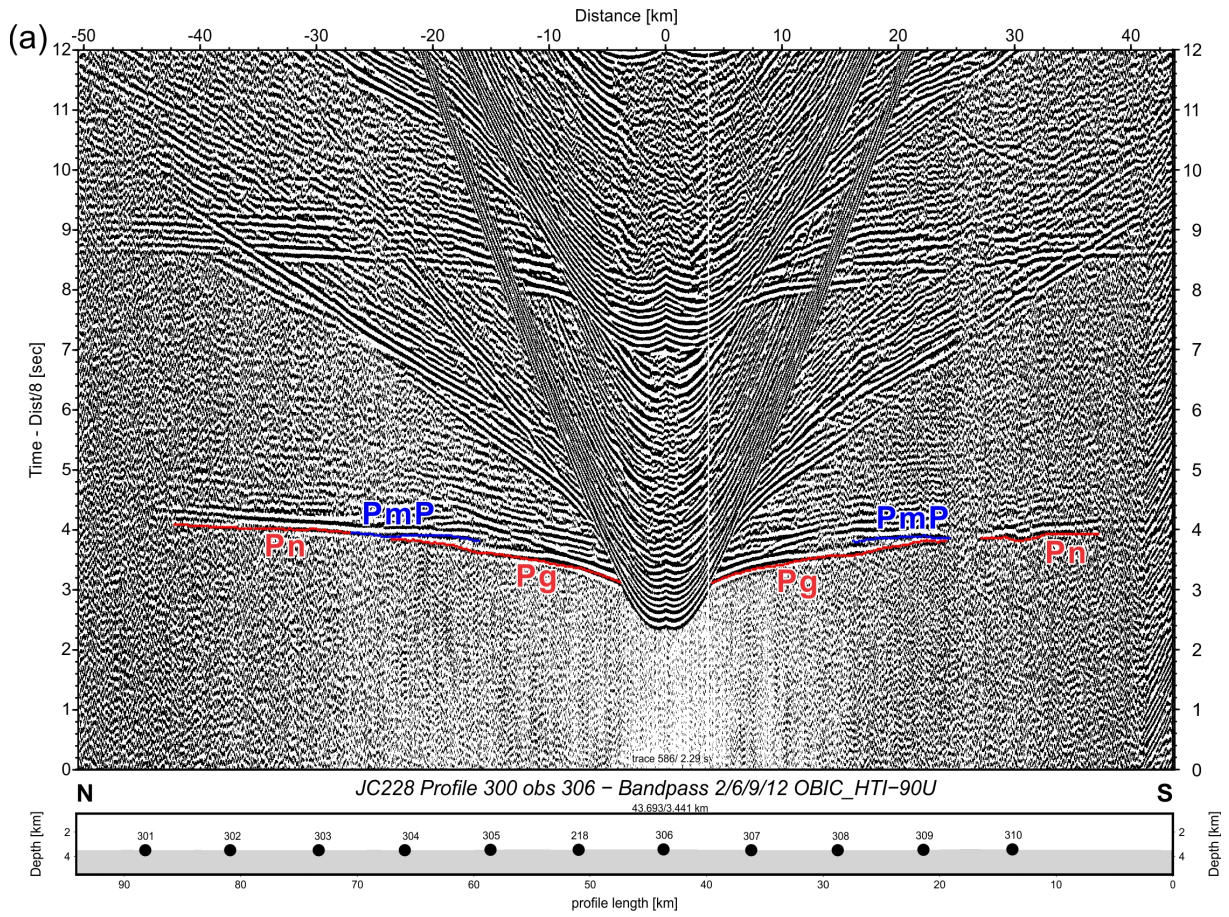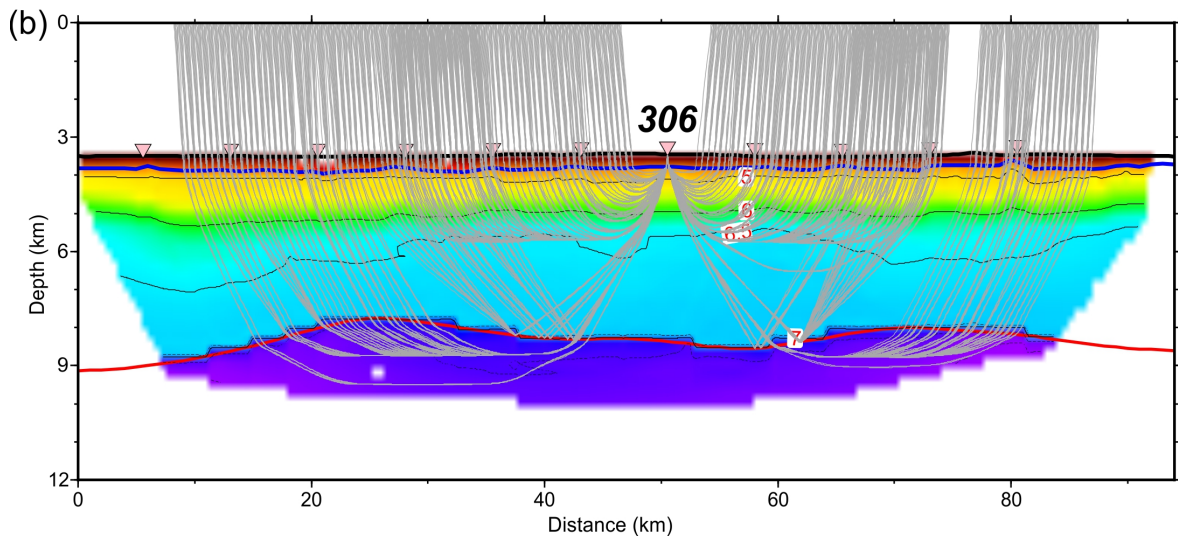

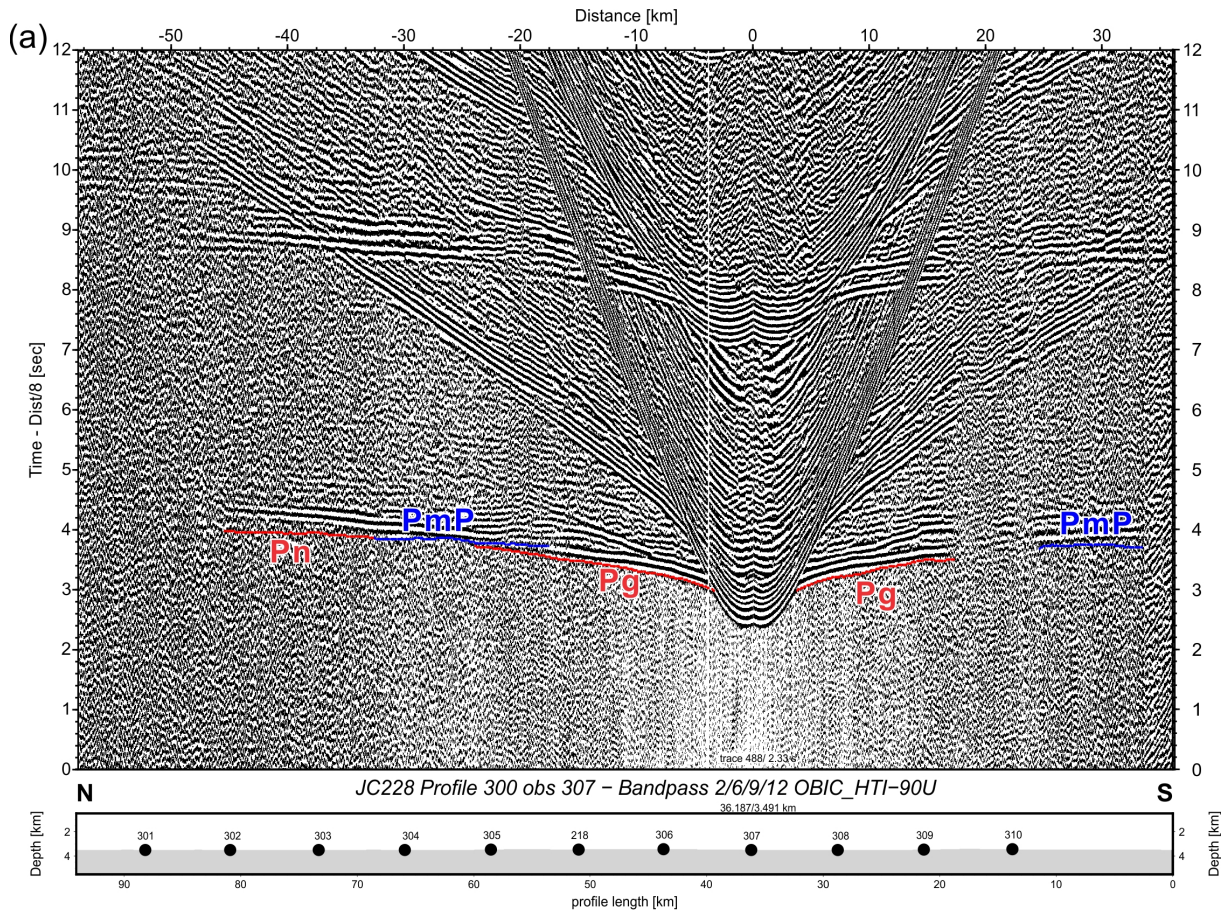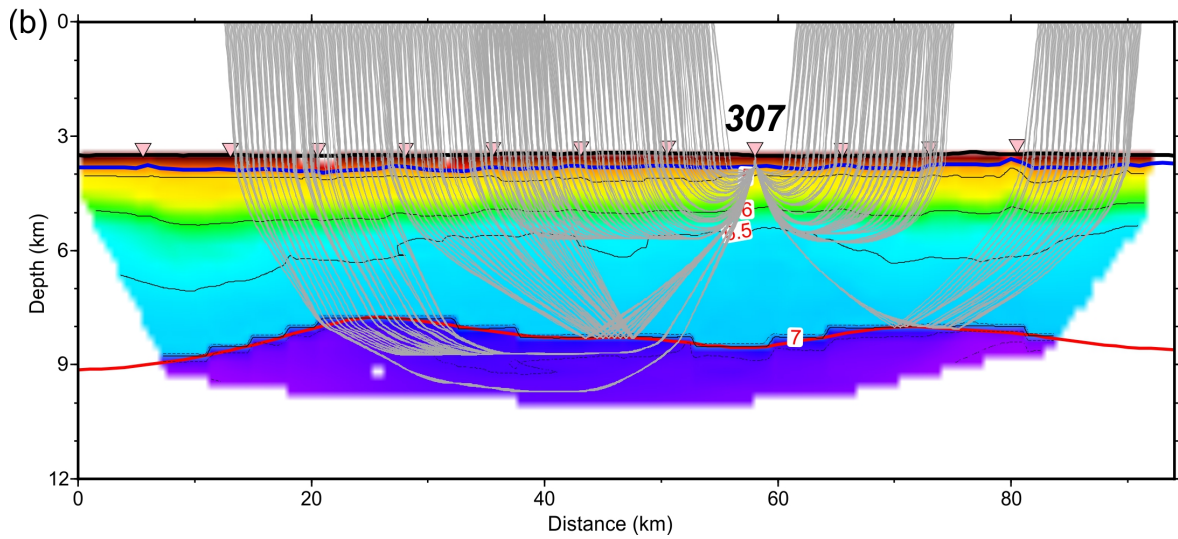

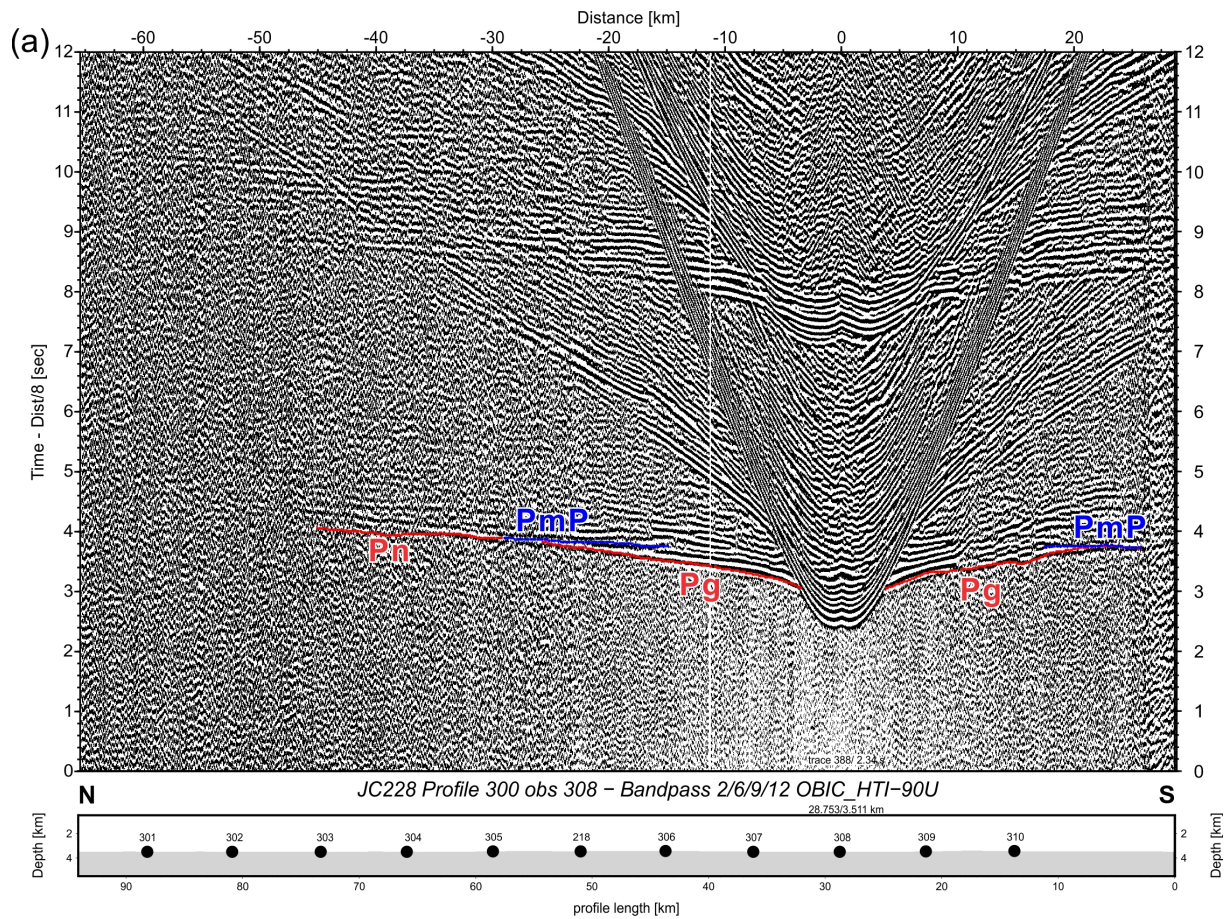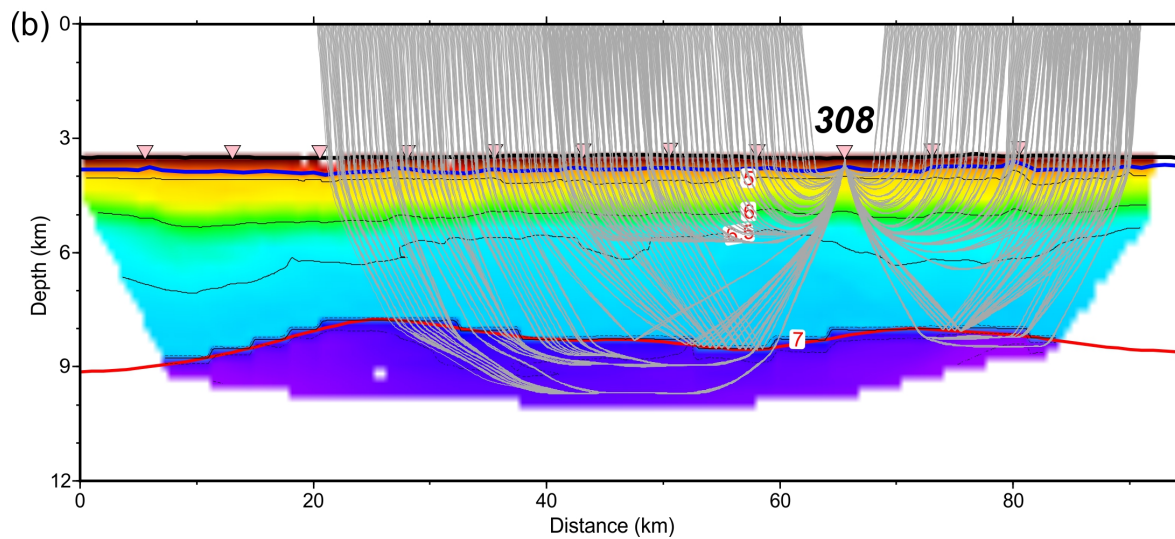

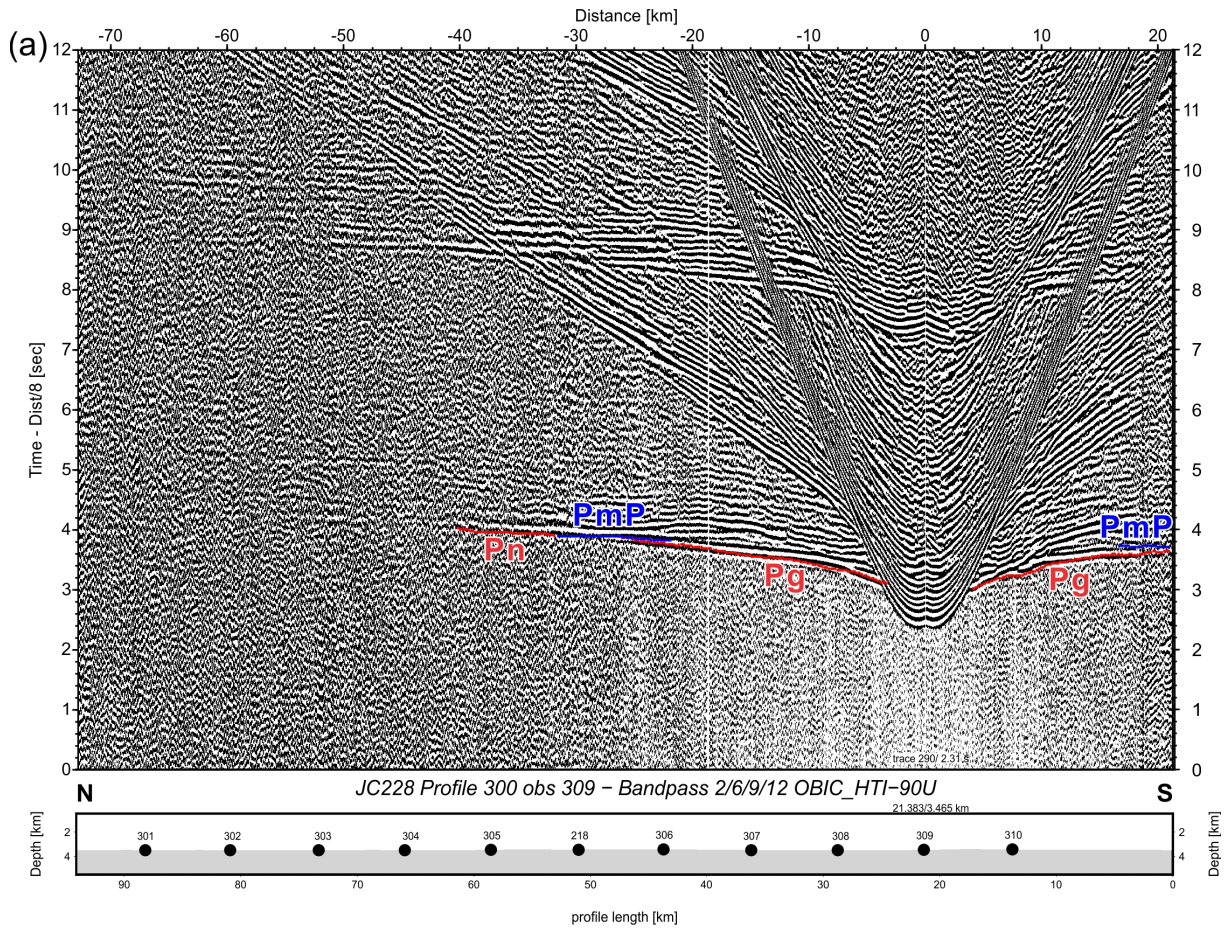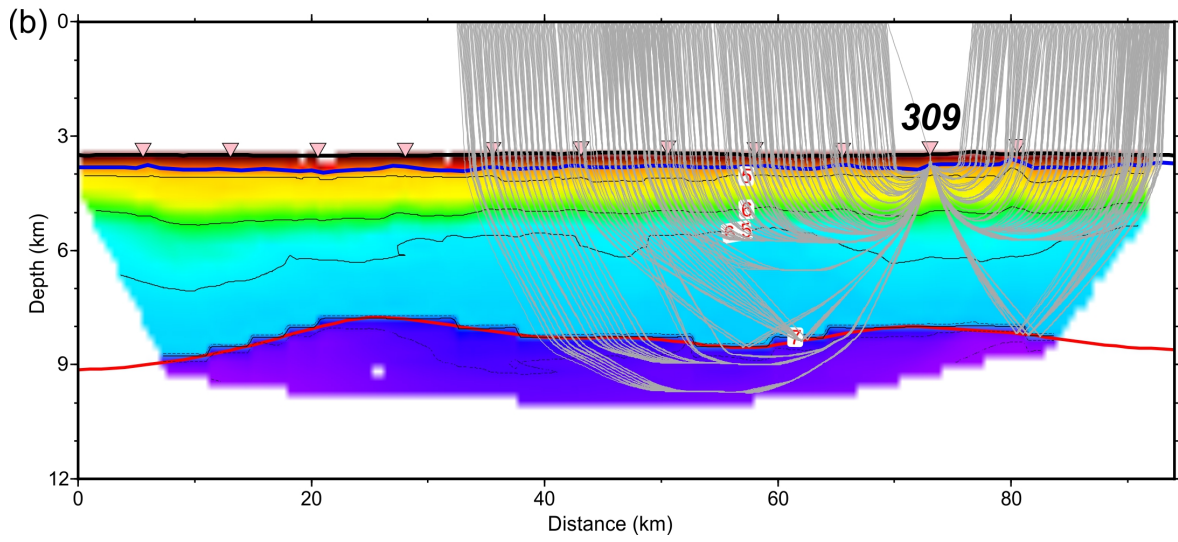

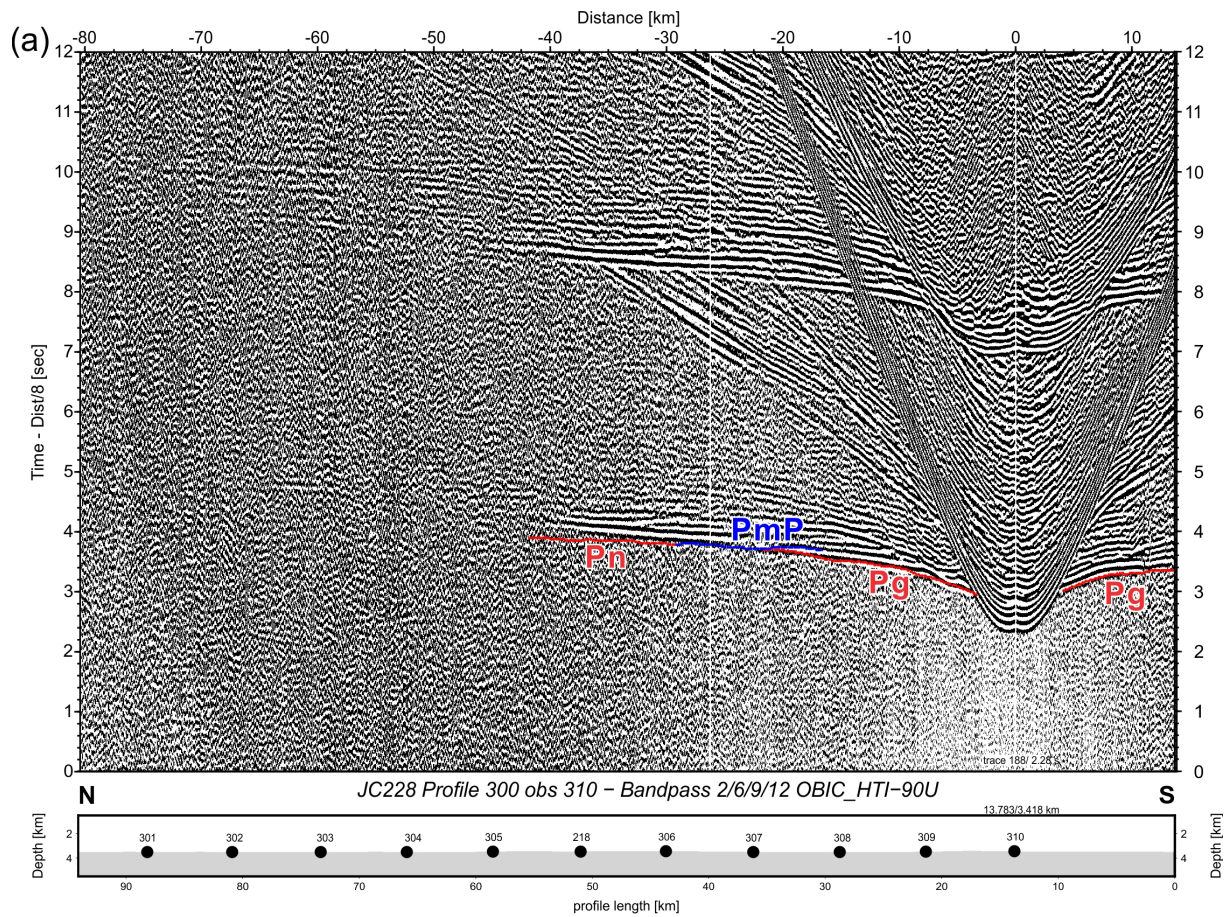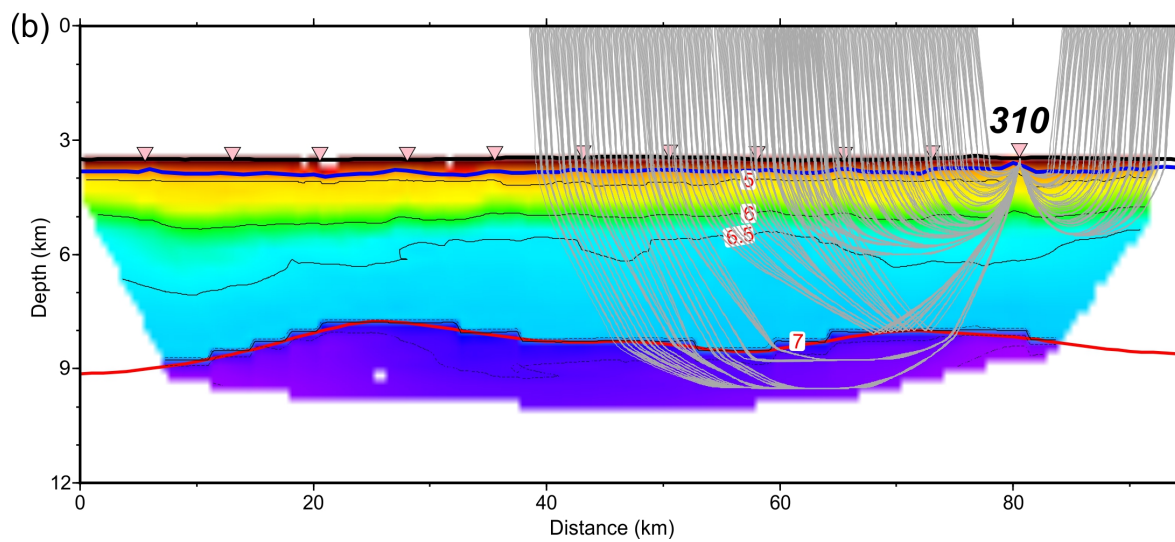

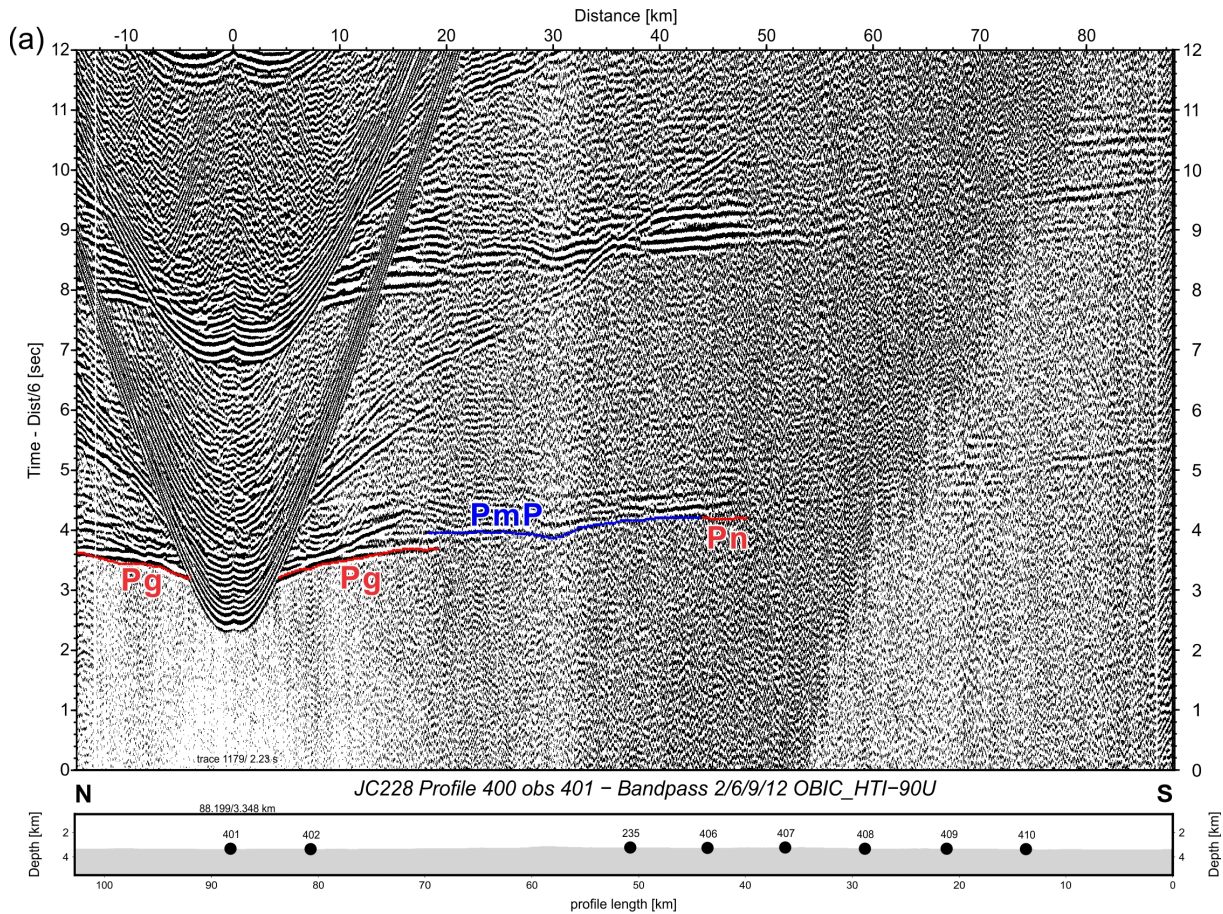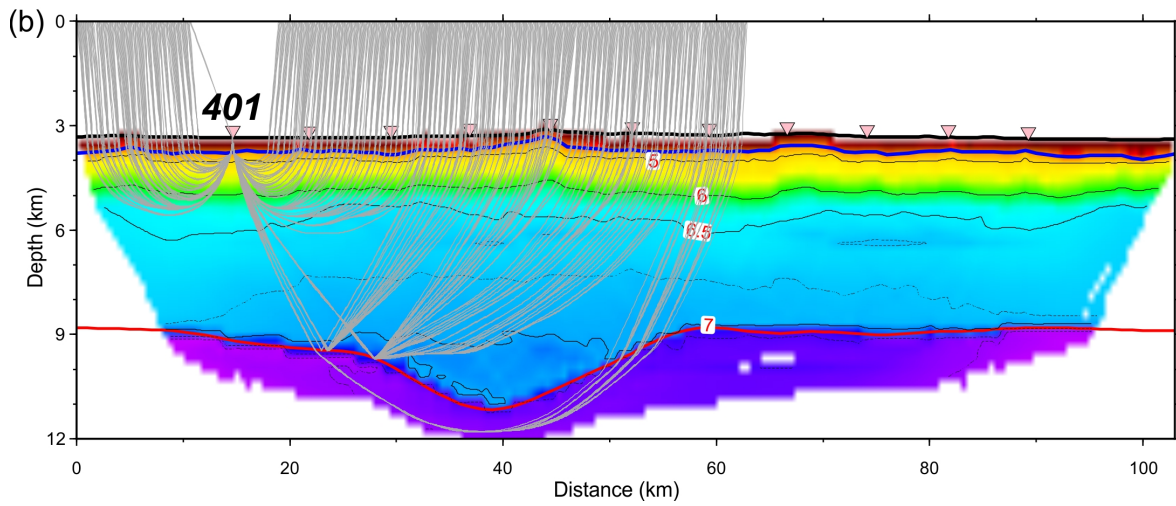

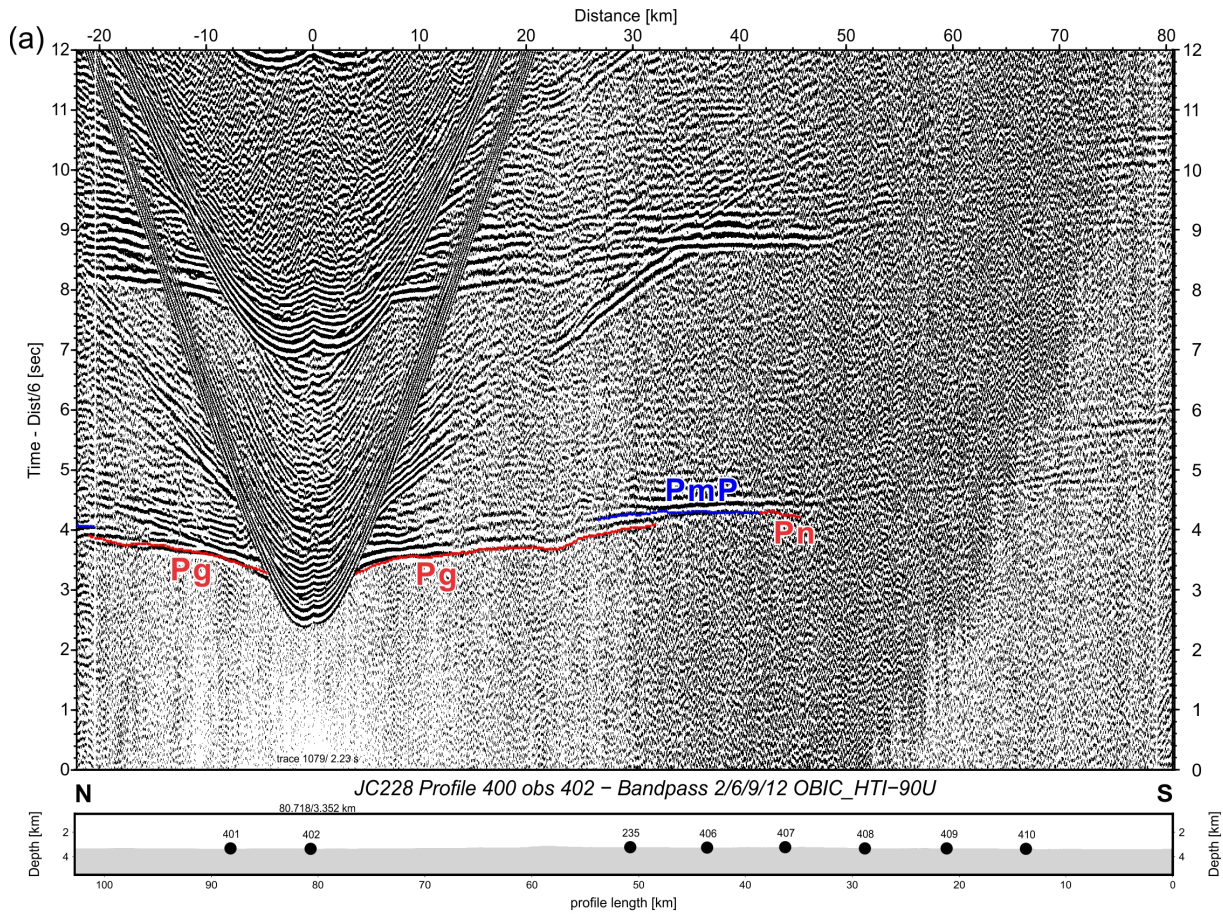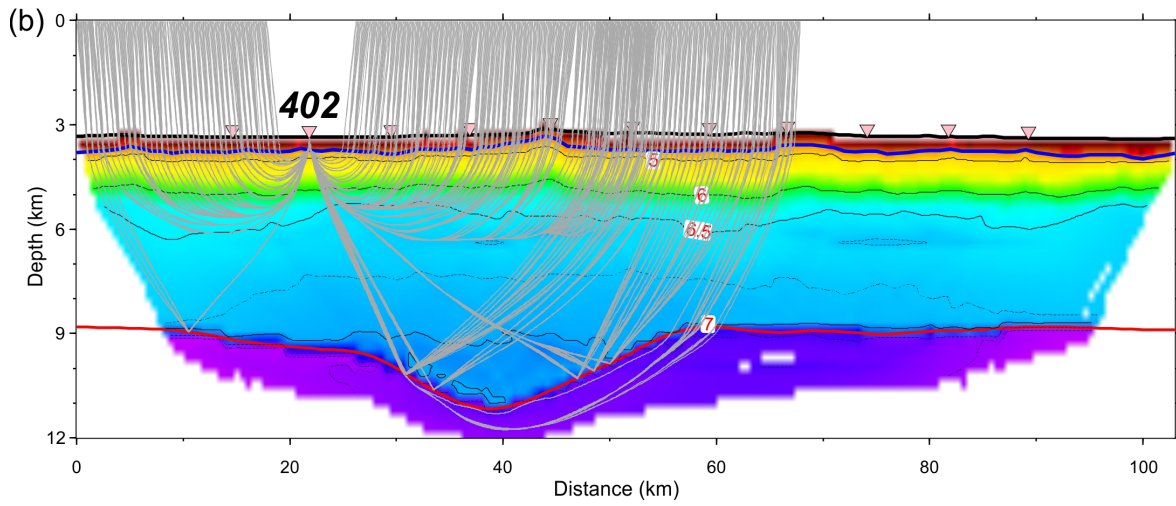

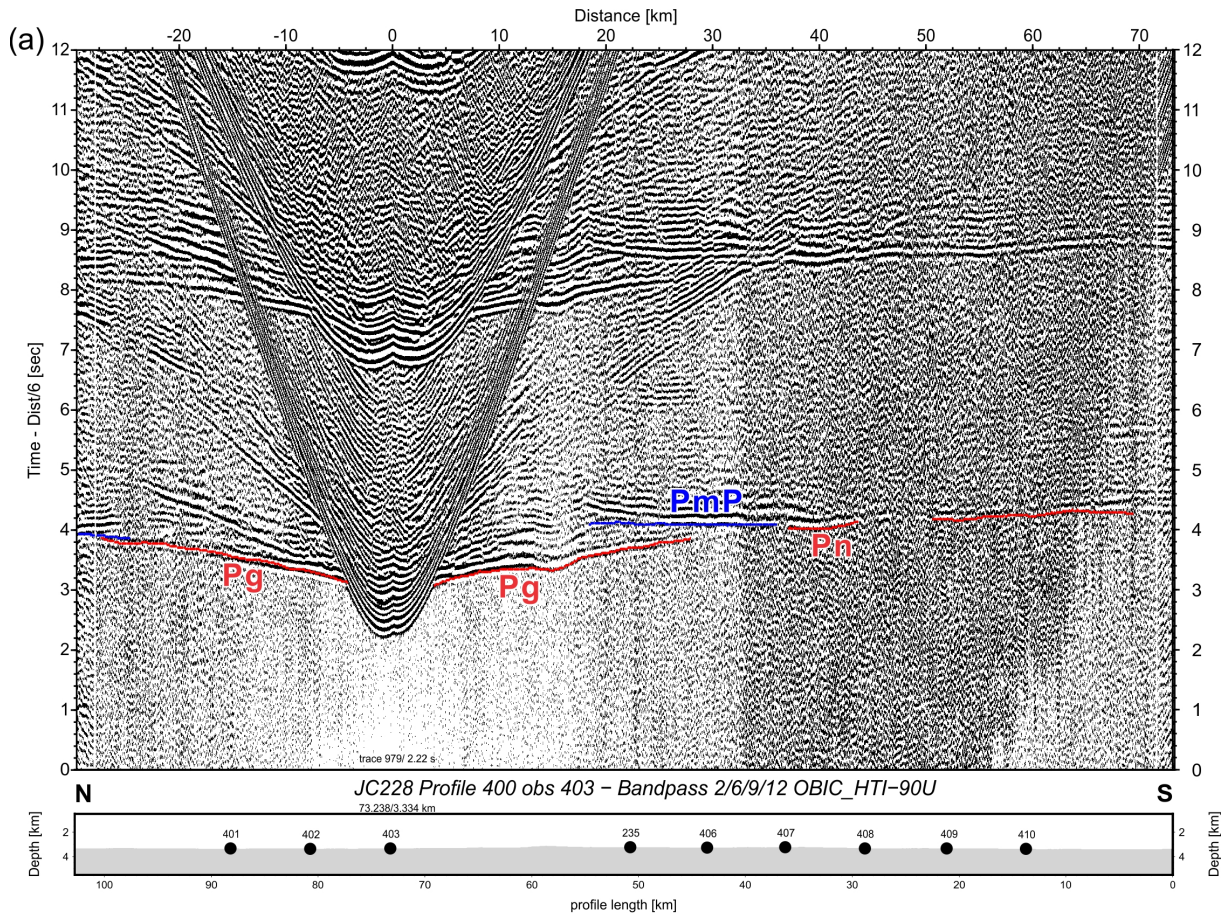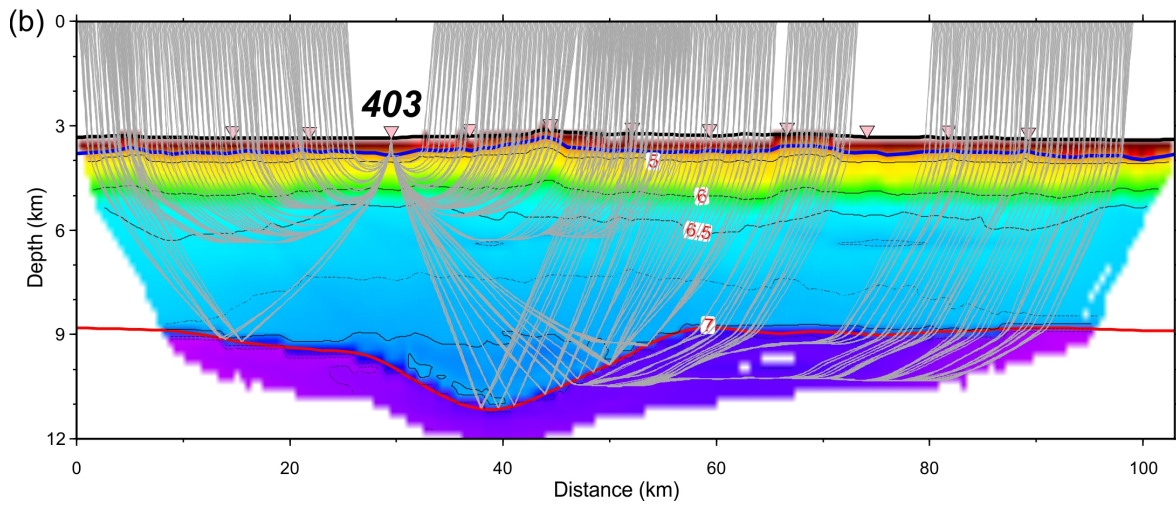

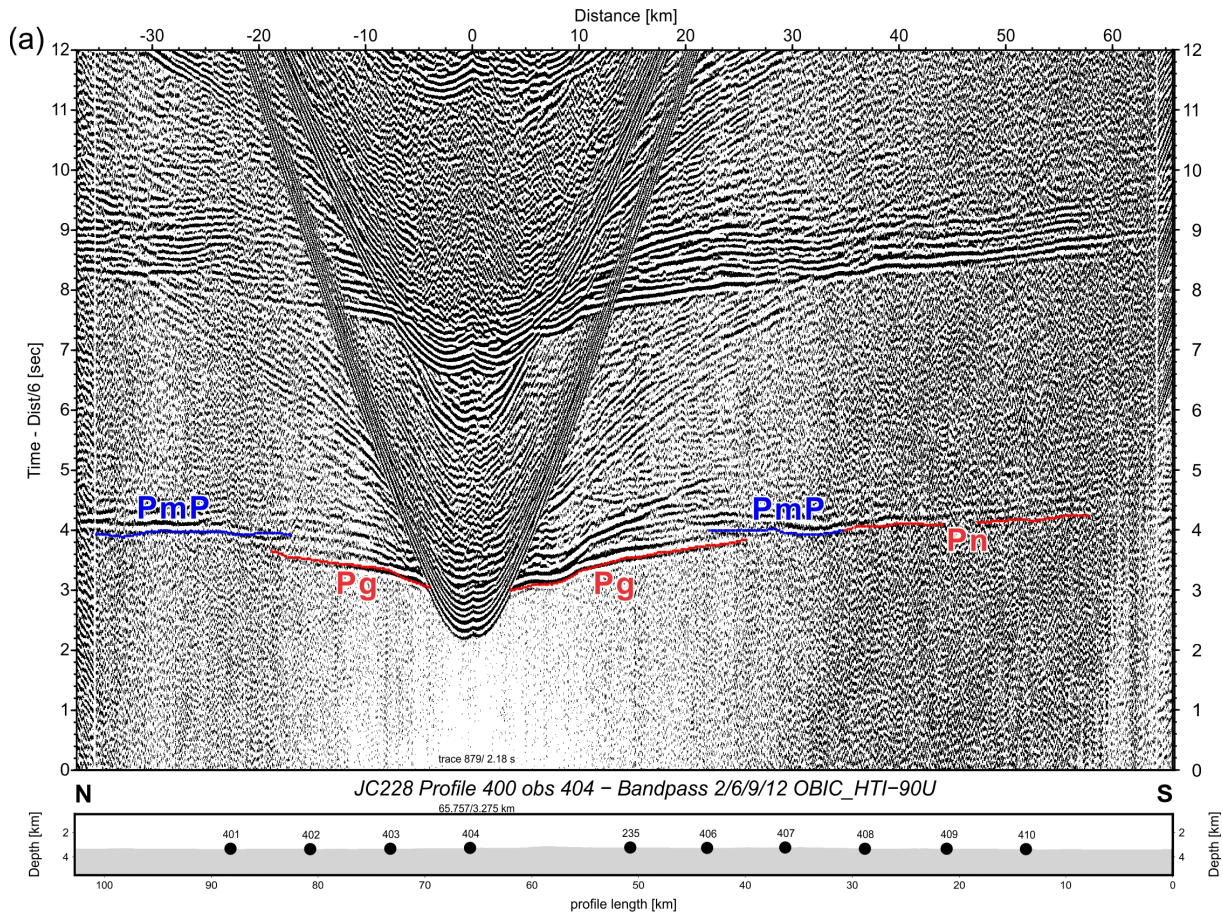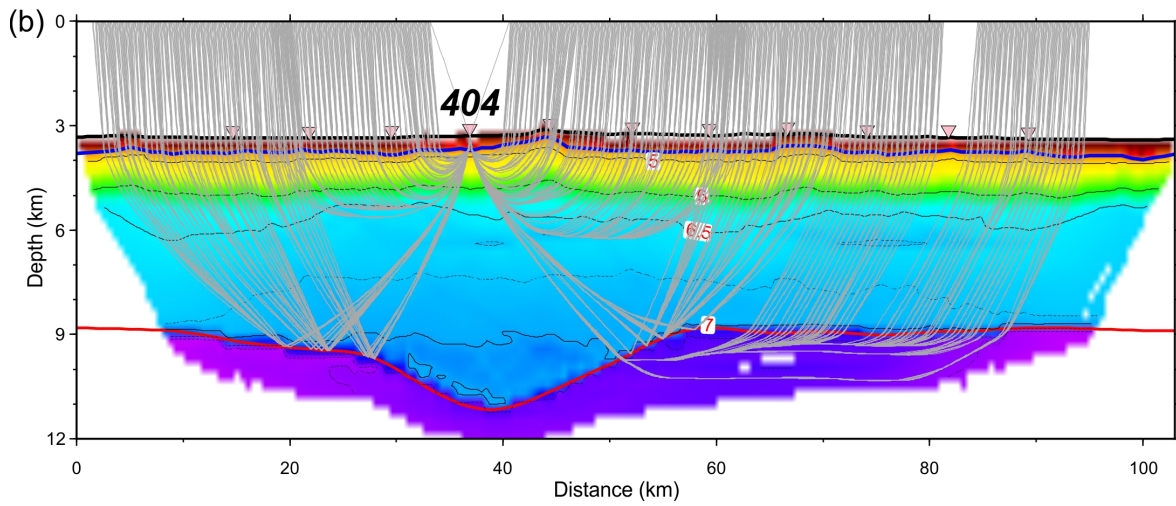

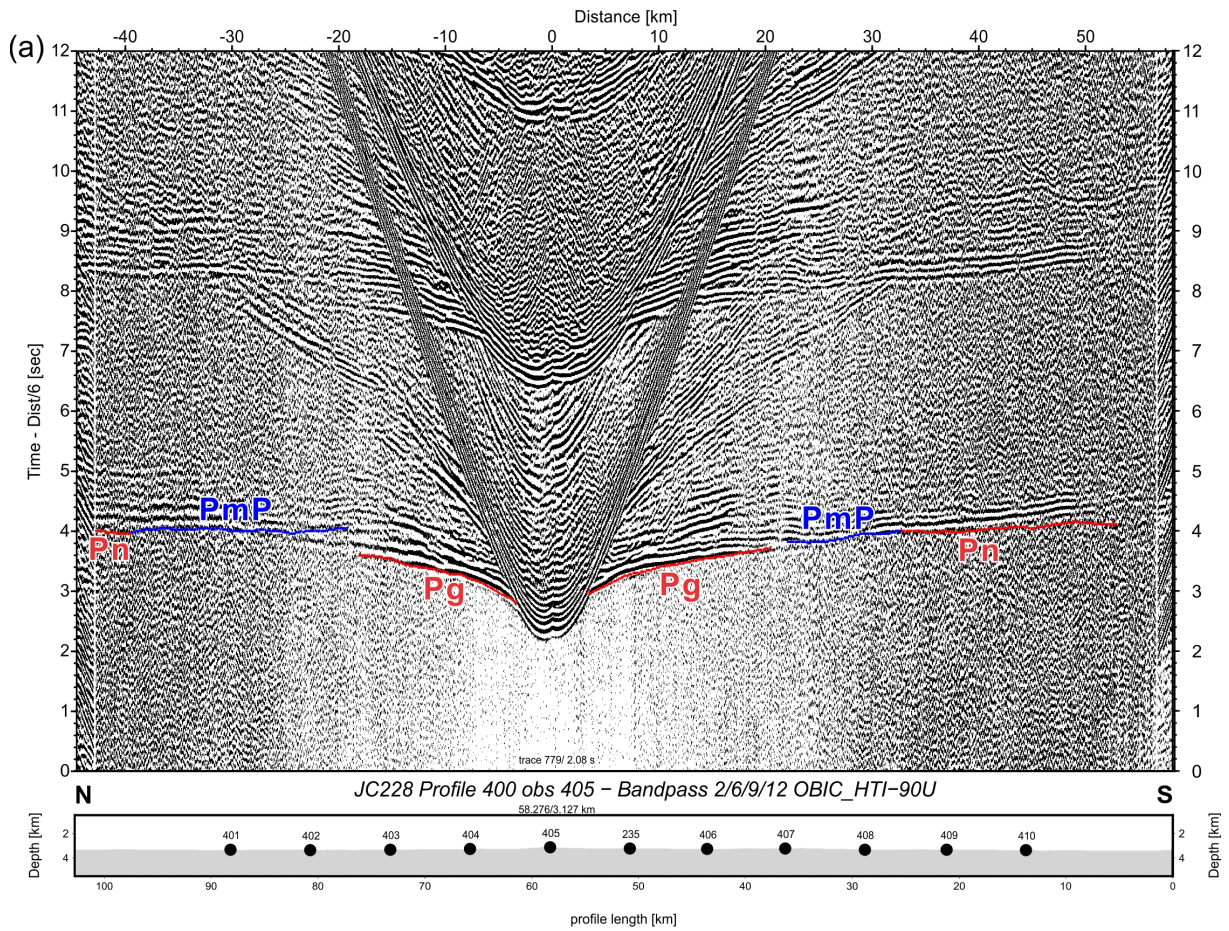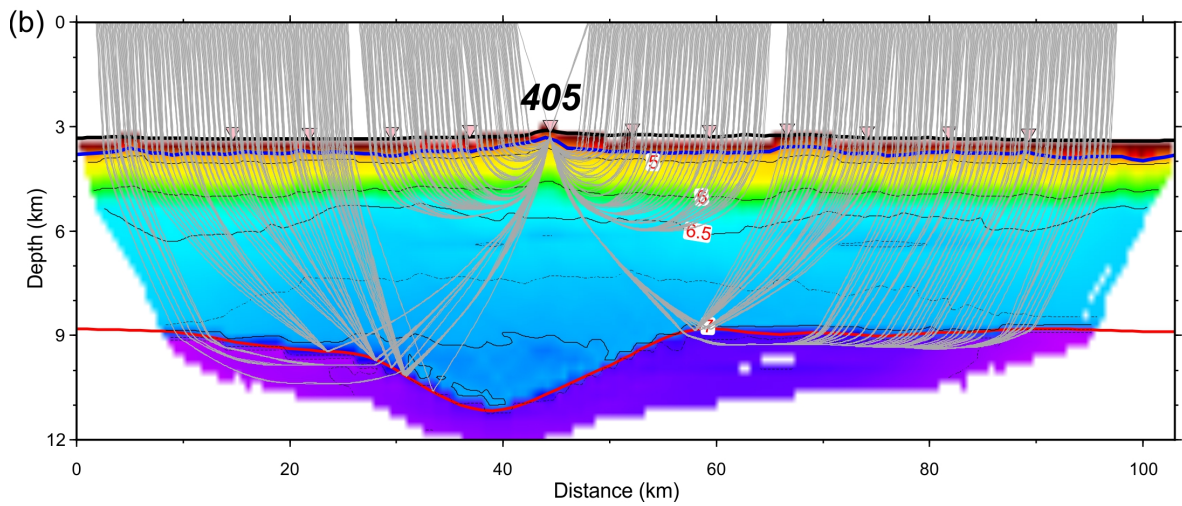

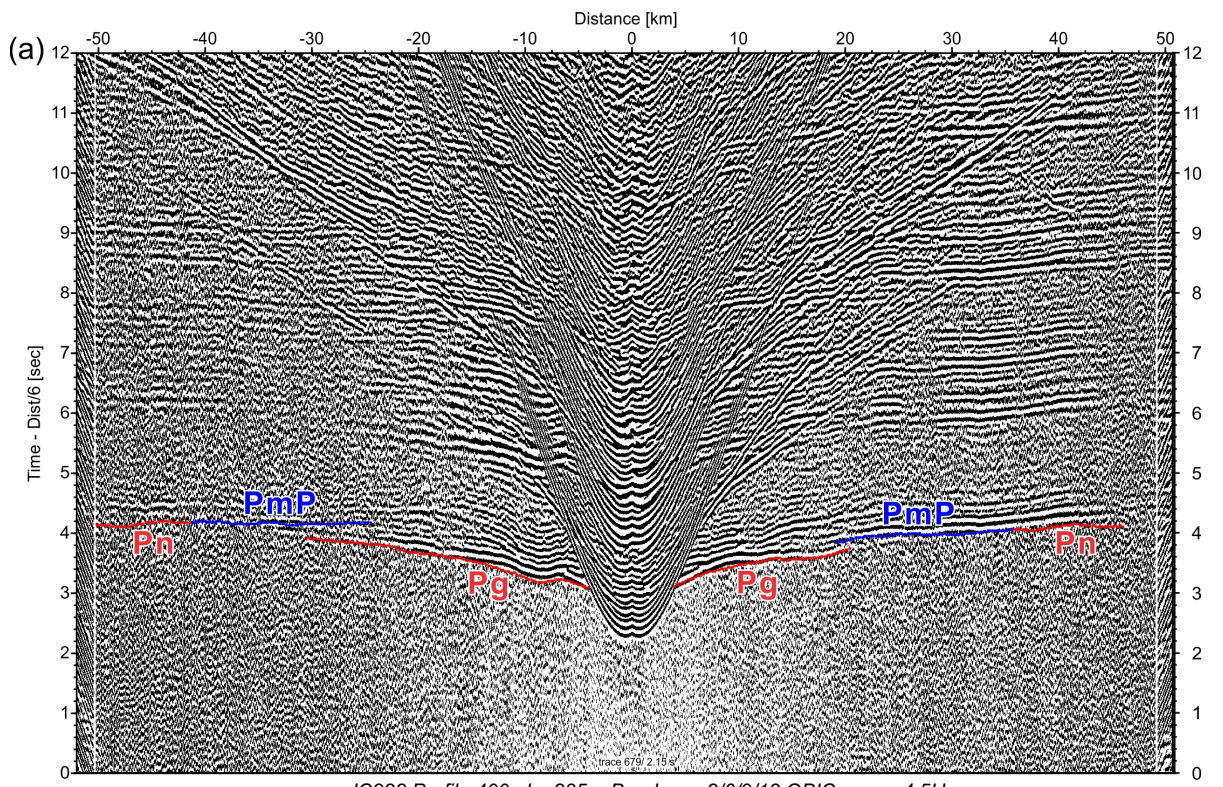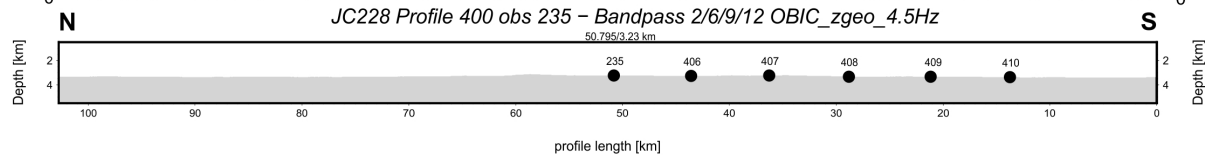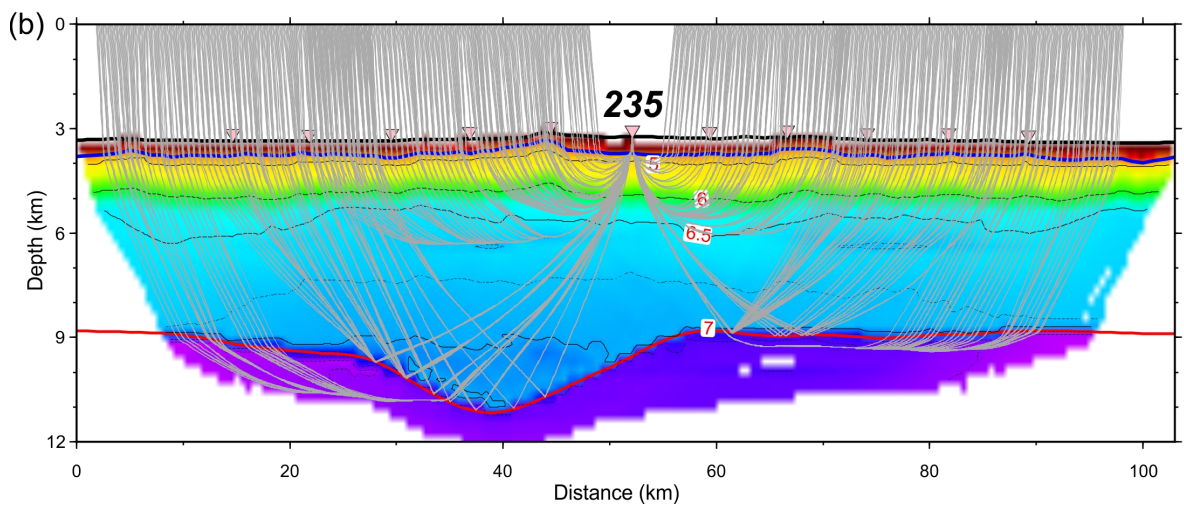

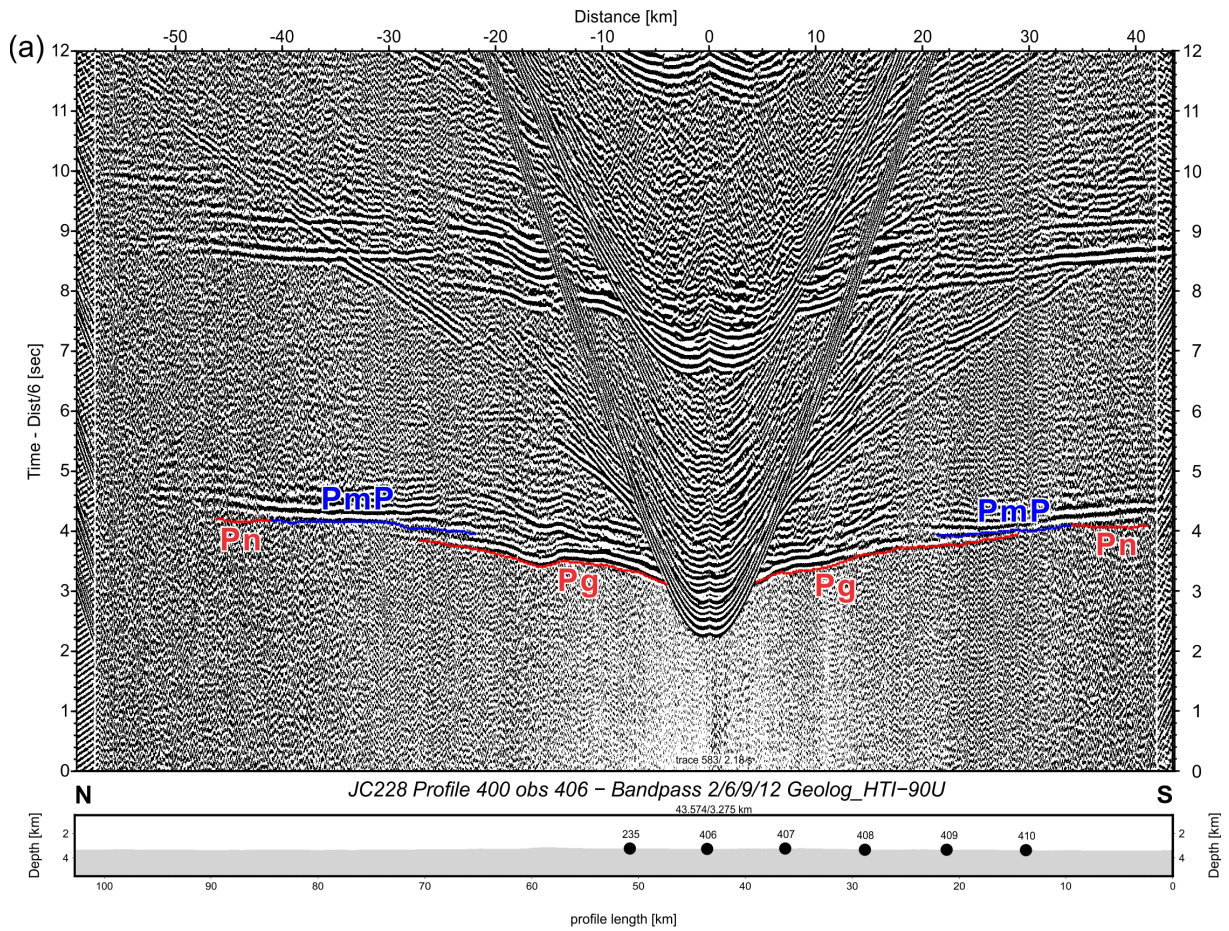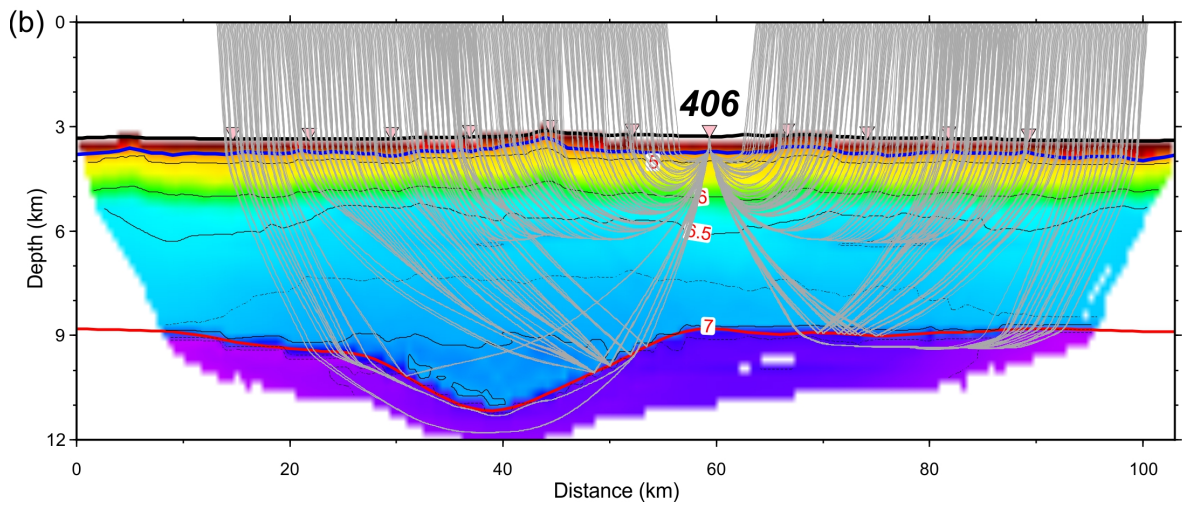

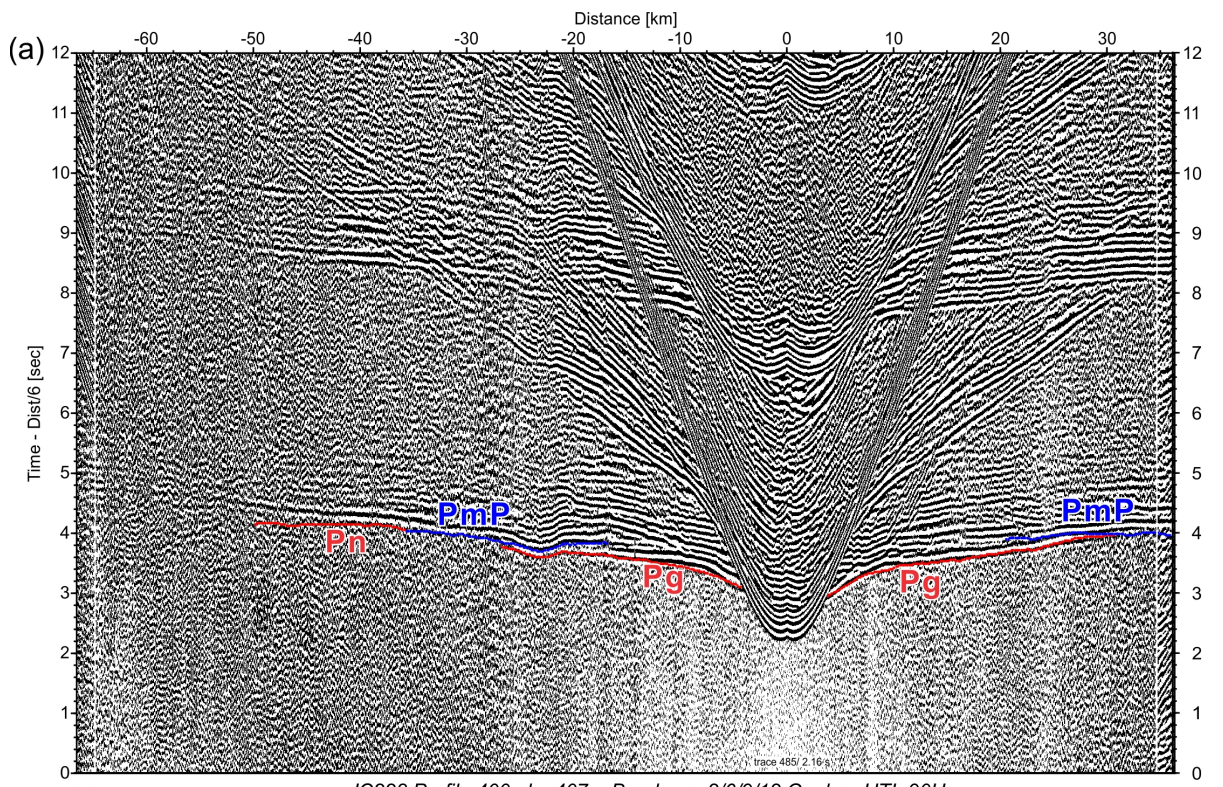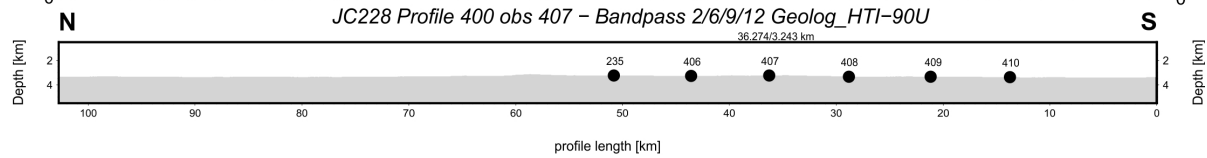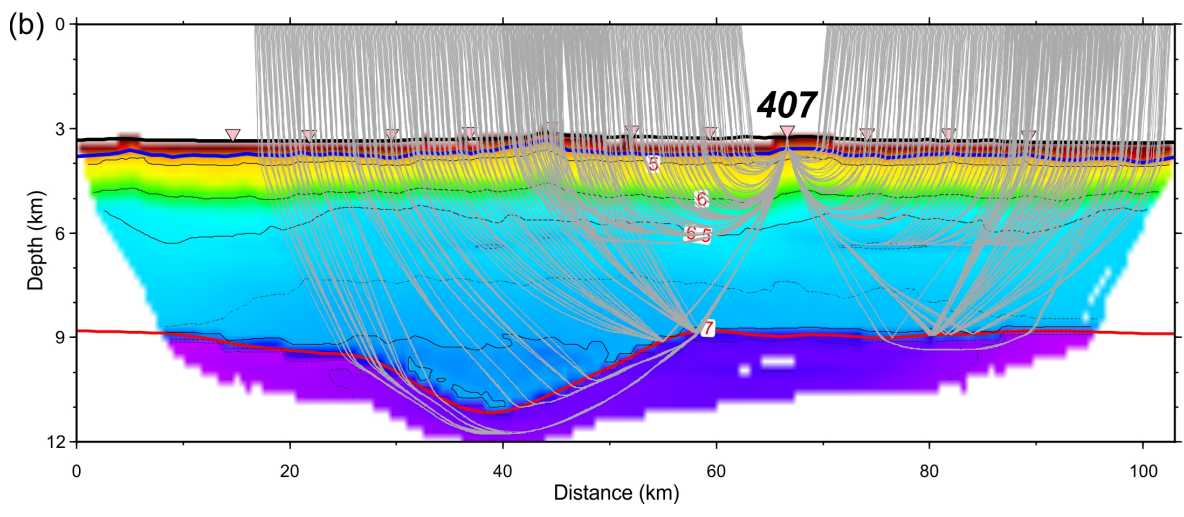

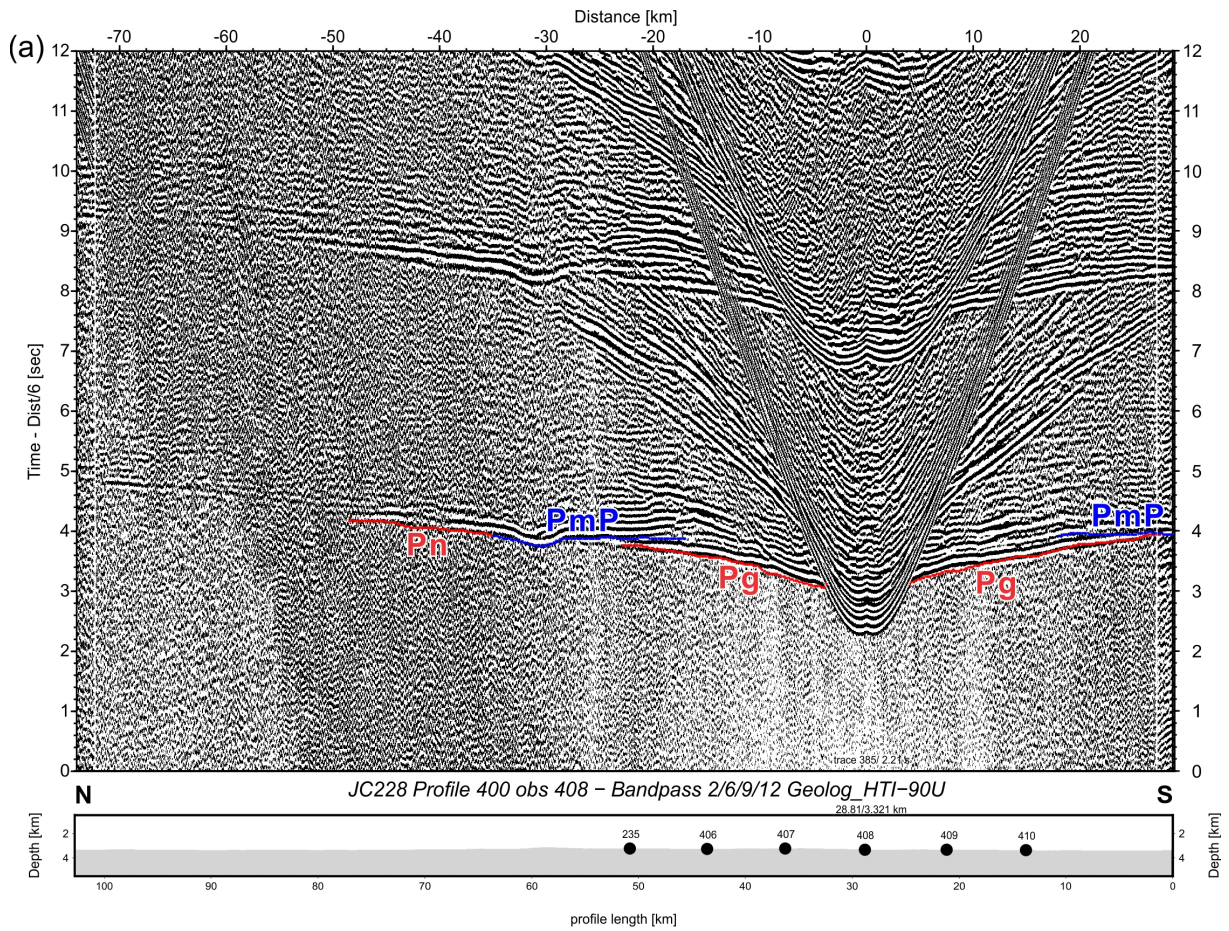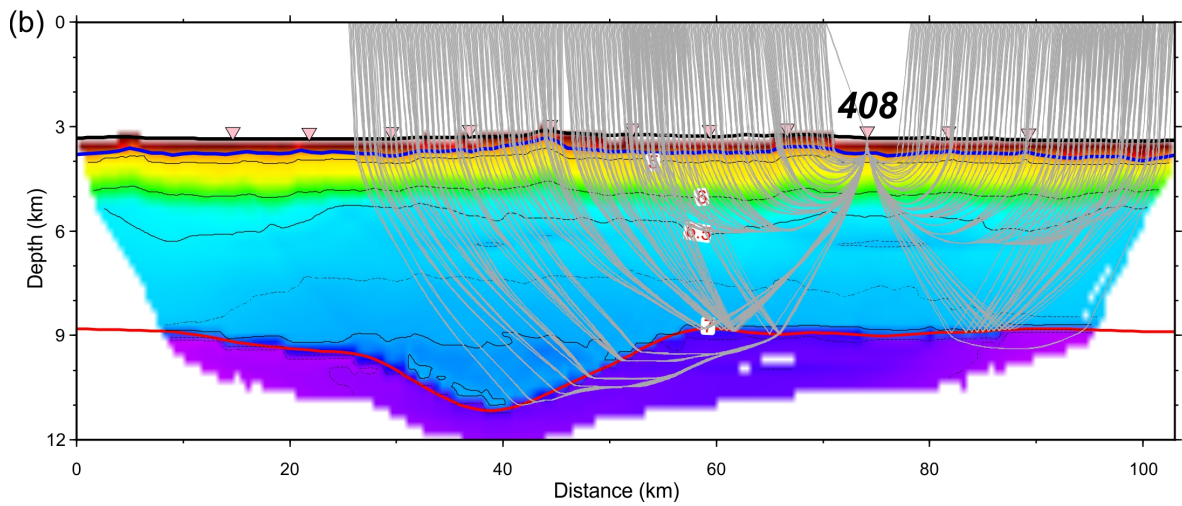

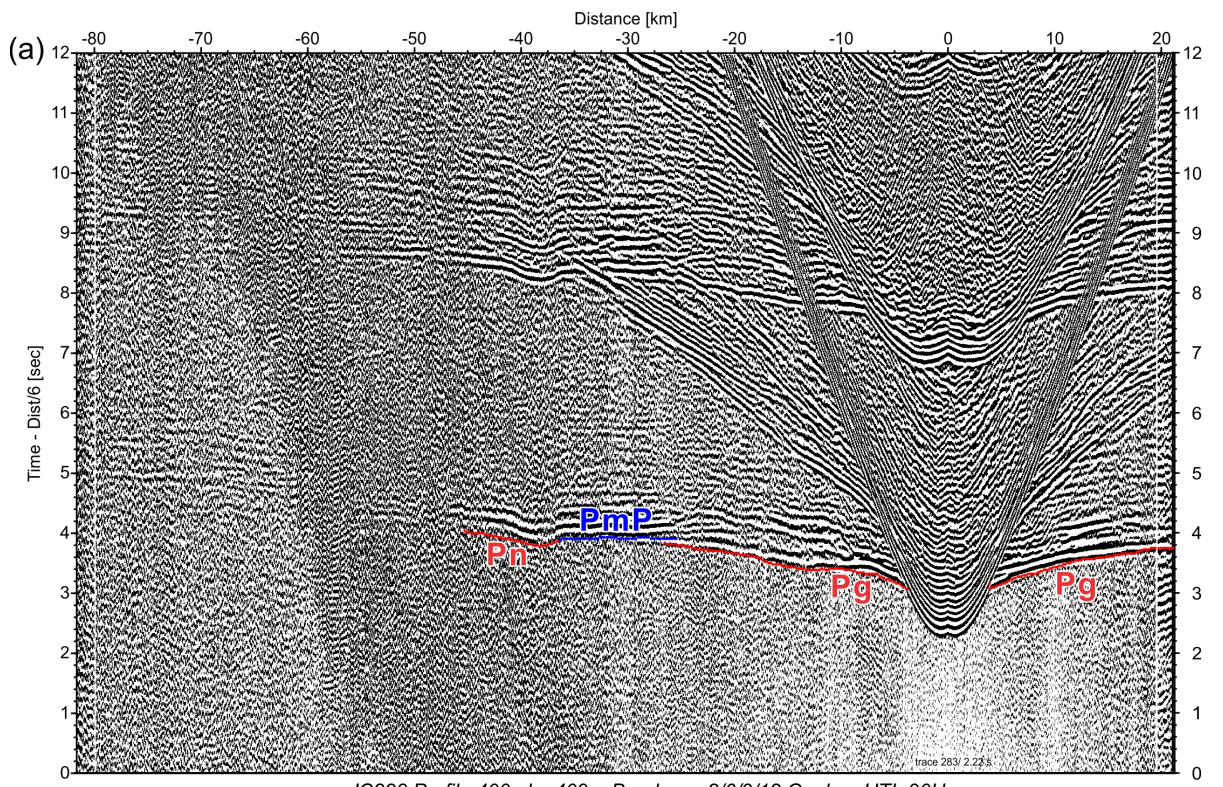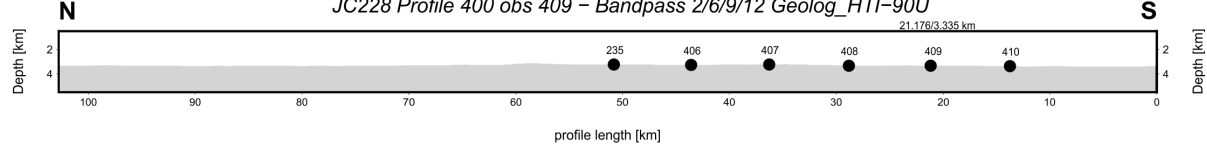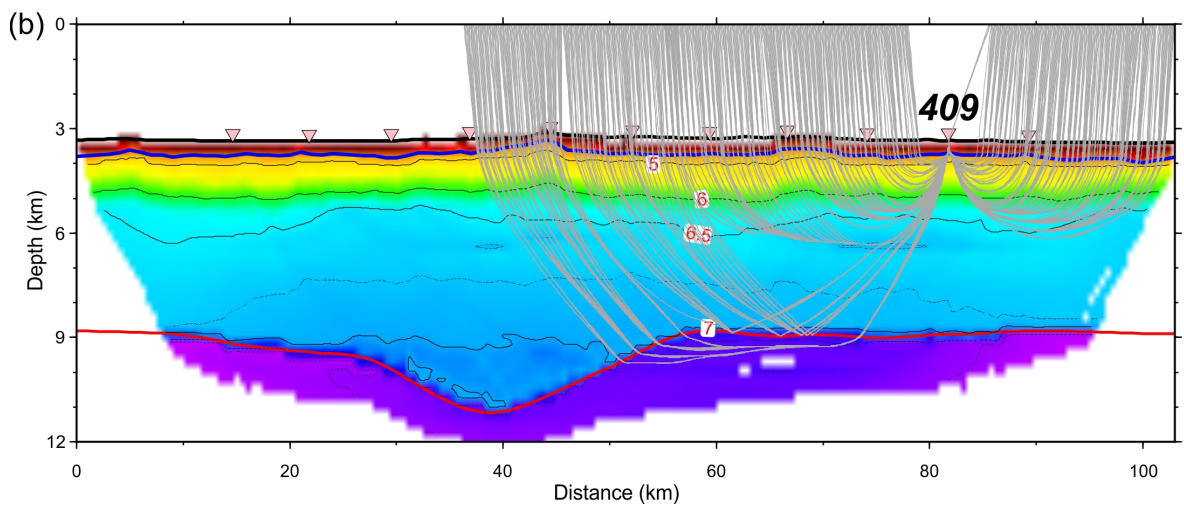

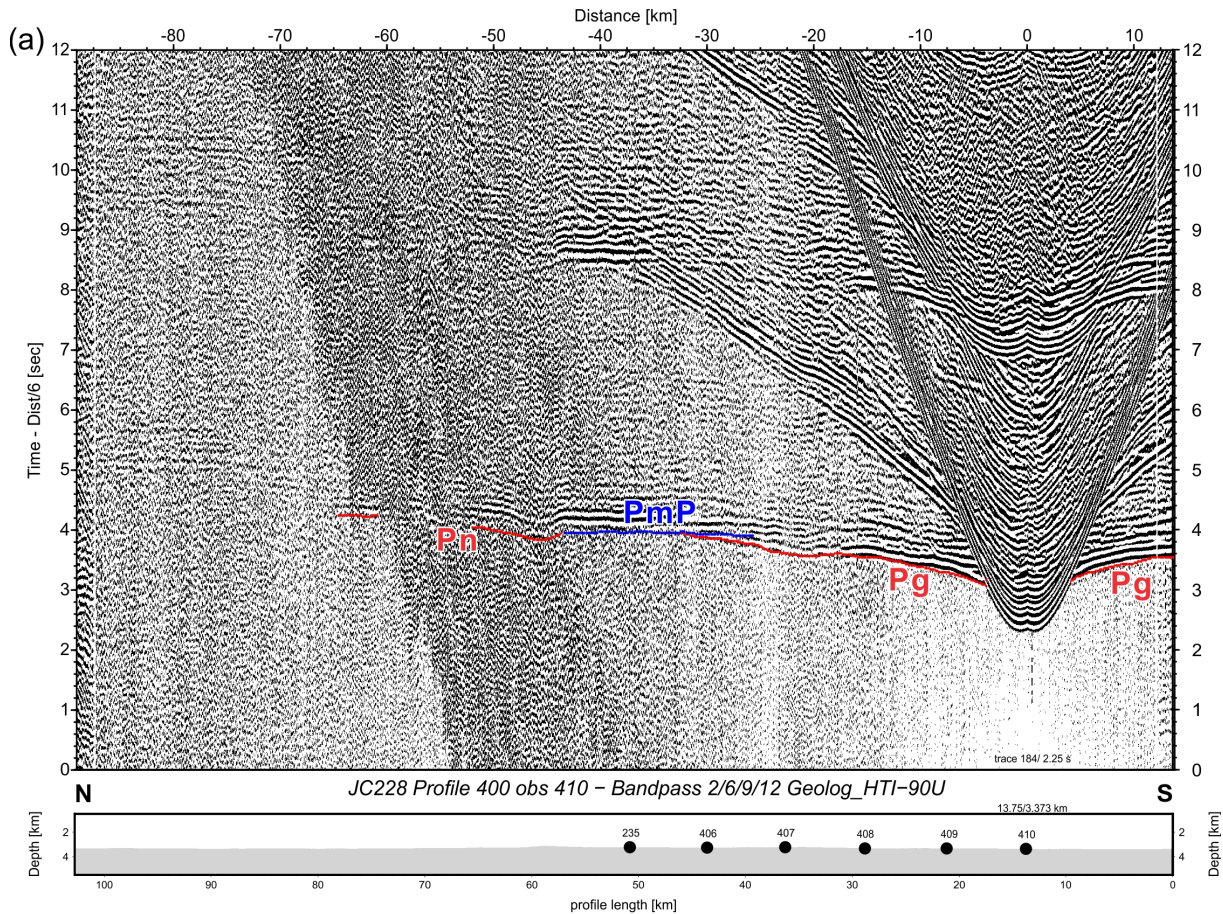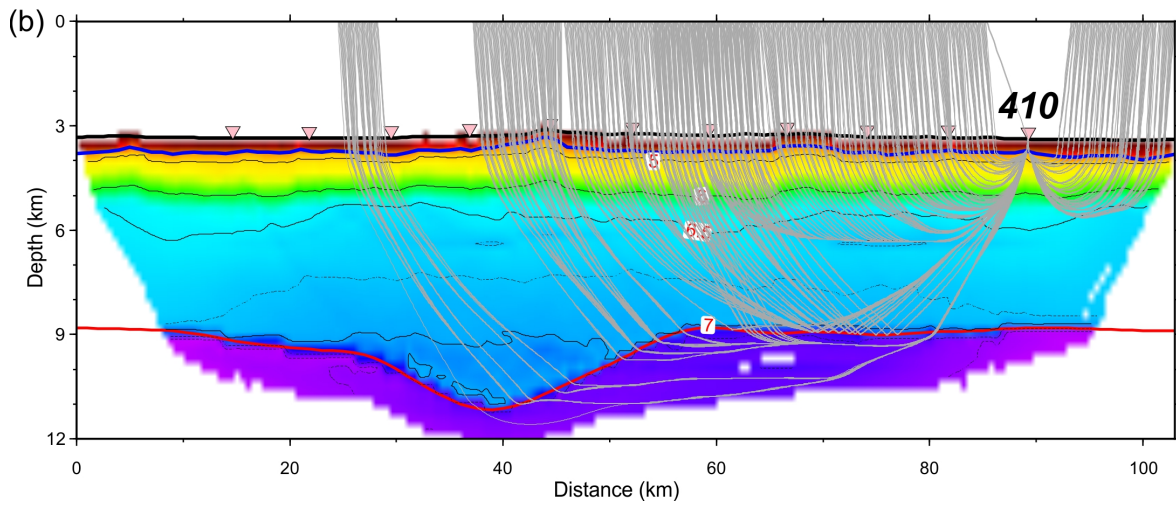

Supplement: Supplementary file 1 [file 0a1d226c22130fa6afe63605.pdf]
