# Supplementary material
Source: Research Square preprint supplement (doi:10.21203/rs.3.rs-9942608/v1)
Supplement: Supplementary file 1 [file 4e9f2b6b1adad6619bd18ebd.xlsx]

## Sheet: Tabelle1
Area	No.	Author, Year Published, Journal (Link)	Method	Line name	Model range (km)	Grid file	Age (Ma)	Full spreading rate (mm/yr)
Southeast Pacific	1	Maksymowicz, 2012, EPSL	Tomography	P07	0~50	Yes	9.6-11.5	71.8-104.0
	2	Contreras-Reyes, 2007, G-cubed	Tomography	P05	0~110	Yes	9.2-11.5	72.0-104.8
	3	Contreras-Reyes, 2008, JGR	Tomography	P09	0~125	Yes	29.4-30.5	129.5-130.4
	4	Moscoso, 2011, EPSL	Tomography	Maule	-130~-60	Yes	35.2-35.7	72.6-73.8
	5	Contreras-Reyes, 2014, GRL	Tomography	P03	30~60	Yes	38.9-39.2	79.1-79.6
	6	Krabbenhoeft, 2004, GJI	Forward	SO146-3	0~40	No	41.3-41.8	134.2-134.4
				SO146-4	40~70	No	28.2-28.6	148.1
				SO146-5	0~60	Yes	39.4-40.1	129.4-137.1
	7	Walther, 2002, GRL	Ray tracing	Walther2002	0~15, 17~38, 42~58	Yes	22.7-22.8	147.6-149.5
	8	Ivandic, 2008, JGR	Tomography	p50	5~80	Yes	21.7-22.7	146.2-188.6
EPR	9	Bazin, 1998, GRL	Tomography	Line2	16~165	No	0.3-1.9	155.6
				Line3	37~127	No	1.2-2.4	155.7
	10	Grevemeyer, 1998, GJI	Tomography	P1	0~90*	Yes	0.5-0.6	154.0-154.4
			Forward	P4	0~75*	Yes	1	153.9-154.3
			Forward	P10	0~90*	Yes	1.7	154.1-154.4
			Forward	P13	0~90*	Yes	2.3	153.9-154.4
			Forward	P17	0~20, 34~82, 94~105	Yes	5.3-5.4	171.2-171.5
			Forward	P23	0~50*	Yes	8	171.3-171.5
	11	Roland, 2012, JGR	Tomography	G3	0~50, 80~125	Yes	0.0-2.2	144.1-145.3
				Q1	0~27, 67~105	Yes	0.3-2.6	142.6-143.7
	12	Canales, 2003, GJI	Tomography	Inner_E	-90~-20, -6~70	Yes	-	-
				Inner_W	-30~33, 46-130	Yes	-	-
				Outer_E	-88~-19, -5~72	Yes	-	-
				Outer_W	-125~-47, -7~62, 77~110	Yes	-	-
				EPR-1	-78~75*	No	-	-
				EPR-5	-66~59*	No	-	-
	13	Van Avendonk, 2001, JGR	Tomography	Profile_A	0~22, 30-59	No	0.3-1.3	110.5-111.6
				Profile_B	0~27, 42~57	No	0.6-0.9	110.5-112.0
				Profile_C	11~26, 40~53	No	0.4-1.1	110.6-111.9
Juan de Fuca	14	Christeson, 2010, G-cubed	Forward	BL302	0~60*	Yes	0.4-0.8	65
	15	Horning, 2016, JGR	Tomography	Line 1	-345~-150	Yes	0.4-4.8	63.6-63.8
	16	Boulahanis, 2022, JGR	Tomography	Line 2_Boulahanis	-200~-120	Yes	0.5-2.9	61.1
	17	Qin, 2020, NC	Tomography	9601	0~55*	Yes	1.8-2.4	60.9-61.4
				9603	0~51*	Yes	0.8-1.5	60.9-61.4
				9605	0~51*	Yes	0.2-0.8	60.8-61.4
				9608	0~55*	Yes	0.1-0.6	60.8-61.4
Mid-north Pacific	18	Christeson, 2010, Geology	Tomography	STEEP02	0~32	Yes	32.7-32.9	55.0-55.7
	19	Shillington, 2015, NG	Tomography	Line 5	25~80	No	52.1-53.5	119.6-120.1
	20	Kopp, 2003, JGR	Tomography	P02	0~40, 120~170	Yes	95.1-95.4	114.1-114.9
				P04	45~75, 167~180	Yes	85.0-85.3	118.8-119.5
	21	Xu, 2022, JGR	Tomography	OB01	-210~-150, 150~220	Yes	116.6-124.5	114.8-114.9
Northwest Pacific	22	Fujie, 2018, NC	Tomography	A2	200~500	Yes	134.4-138.5	136.6-139.5
				A3	200~488	Yes	136.0-138.1	137.1-138.7
	23	Fujie, 2016, GRL	Tomography	R2	33~246*	Yes	134.0-136.3	135.7-141.4
	24	Kodaira, 2014, NG	Tomography	Kodaira2014NG	42~192*	Yes	135.2-135.6	134.8-137.9
	25	Fujie, 2020, Geology	Tomography	A4	250~300, 325~630	Yes	136.8-140.0	137.4-139.4
	26	Fujie, 2023, PEPS	Tomography	A6	190~340	Yes	137.9-139.7	139.2-139.8
	27	Ohira, 2017, EPSL	Tomography	KY14-06	155~570	Yes	137.0-144.7	118.8-126.4
	28	Oikawa, 2010, EPS	Tomography	MTr6	5~184*	Yes	156.3-158.6	90.7-90.8
				MTr8	0~159*	Yes	156.8-156.8	89.9-90.8
	29	Kaneda, 2010, G-cubed	Tomography	MTr5	20~200, 790~910	No	159.7-168.6	83.5-123.1
Southwest Pacific	30	Contreras-Reyes, 2010, EPSL	Tomography	CR2010	40~90, 320~340	Yes	92.4-106.7	72.7-75.1
Indian Ocean	31	Holmes, 2008, G-cubed	Tomography	Holmes_L2	37~88	Yes	0.6	67.5
				Holmes_L3	43~95	Yes	0.0-0.1	67.6-67.7
				Holmes_L4	28~90	Yes	0.6-0.7	67.6-67.7
	32	Grevemeyer, 2001, GJI	Forward	Grevemeyer2001	375~415, 430~445, 458~500	No	42.9-54.0	68.7-115.3
	33	Collier, 2009, JGR	Forward and inversion	Seychelles	50~250	Yes	62.1-66.3	115.4-122.9
*: The entire model is considered in the global compilation
References
1. Maksymowicz, A., Contreras-Reyes, E., Grevemeyer, I., & Flueh, E. R. (2012). Structure and geodynamics of the post-collision zone between the Nazca–Antarctic spreading center and South America. Earth and Planetary Science Letters, 345, 27-37.
2. Contreras‐Reyes, E., Grevemeyer, I., Flueh, E. R., Scherwath, M., & Heesemann, M. (2007). Alteration of the subducting oceanic lithosphere at the southern central Chile trench–outer rise. Geochemistry, Geophysics, Geosystems, 8(7).
3. Contreras‐Reyes, E., Grevemeyer, I., Flueh, E. R., & Reichert, C. (2008). Upper lithospheric structure of the subduction zone offshore of southern Arauco peninsula, Chile, at∼ 38 S. Journal of Geophysical Research: Solid Earth, 113(B7).
4. Moscoso, E., Grevemeyer, I., Contreras-Reyes, E., Flueh, E. R., Dzierma, Y., Rabbel, W., & Thorwart, M. (2011). Revealing the deep structure and rupture plane of the 2010 Maule, Chile earthquake (Mw= 8.8) using wide angle seismic data. Earth and Planetary Science Letters, 307(1-2), 147-155.
5. Contreras‐Reyes, E., Becerra, J., Kopp, H., Reichert, C., & Díaz‐Naveas, J. (2014). Seismic structure of the north‐central Chilean convergent margin: Subduction erosion of a paleomagmatic arc. Geophysical Research Letters, 41(5), 1523-1529.
6. Krabbenhöft, A., Bialas, J., Kopp, H., Kukowski, N., & Hübscher, C. (2004). Crustal structure of the Peruvian continental margin from wide-angle seismic studies. Geophysical Journal International, 159(2), 749-764.
7. Walther, C., & Flueh, E. (2002). Remnant of the ancient Farallon Plate breakup: A low‐velocity body in the lower oceanic crust off Nicoya Peninsula, Costa Rica‐evidence from wide‐angle seismics. Geophysical research letters, 29(19), 45-1.
8. Ivandic, M., Grevemeyer, I., Berhorst, A., Flueh, E. R., & McIntosh, K. (2008). Impact of bending related faulting on the seismic properties of the incoming oceanic plate offshore of Nicaragua. Journal of Geophysical Research: Solid Earth, 113(B5).
9. Bazin, S., van Avendonk, H., Harding, A. J., Orcutt, J. A., Canales, J. P., & Detrick, R. S. (1998). Crustal structure of the flanks of the East Pacific Rise: Implications for overlapping spreading centers. Geophysical research letters, 25(12), 2213-2216.
10. Grevemeyer, I., Weigel, W., & Jennrich, C. (1998). Structure and ageing of oceanic crust at 14 S on the East Pacific Rise. Geophysical Journal International, 135(2), 573-584.
11. Roland, E., Lizarralde, D., McGuire, J. J., & Collins, J. A. (2012). Seismic velocity constraints on the material properties that control earthquake behavior at the Quebrada‐Discovery‐Gofar transform faults, East Pacific Rise. Journal of Geophysical Research: Solid Earth, 117(B11).
12. Pablo Canales, J., Detrick, R. S., Toomey, D. R., & Wilcock, W. S. (2003). Segment-scale variations in the crustal structure of 150–300 kyr old fast spreading oceanic crust (East Pacific Rise, 8° 15′ N–10° 5′ N) from wide-angle seismic refraction profiles. Geophysical Journal International, 152(3), 766-794.
13. Van Avendonk, H. J. A., Harding, A. J., Orcutt, J. A., & McClain, J. S. (2001). Contrast in crustal structure across the Clipperton transform fault from travel time tomography. Journal of Geophysical Research: Solid Earth, 106(B6), 10961-10981.
14. Christeson, G. L., Karson, J. A., & McIntosh, K. D. (2010). Mapping of seismic layer 2A/2B boundary above the sheeted dike unit at intermediate spreading crust exposed near the Blanco Transform. Geochemistry, Geophysics, Geosystems, 11(3).
15. Horning, G., Canales, J. P., Carbotte, S. M., Han, S., Carton, H., Nedimović, M. R., & Van Keken, P. E. (2016). A 2‐D tomographic model of the Juan de Fuca plate from accretion at axial seamount to subduction at the Cascadia margin from an active source ocean bottom seismometer survey. Journal of Geophysical Research: Solid Earth, 121(8), 5859-5879.
16. Boulahanis, B., Carbotte, S. M., Canales, J. P., Han, S., & Nedimović, M. R. (2022). Structure and evolution of northern Juan de Fuca crust and uppermost mantle over the last 8 Ma from an active‐source seismic tomography study. Journal of Geophysical Research: Solid Earth, 127(9), e2022JB023987.
17. Qin, Y., Singh, S. C., Grevemeyer, I., Marjanović, M., & Roger Buck, W. (2020). Discovery of flat seismic reflections in the mantle beneath the young Juan de Fuca Plate. Nature Communications, 11(1), 4122.
18. Christeson, G. L., Gulick, S. P., van Avendonk, H. J., Worthington, L. L., Reece, R. S., & Pavlis, T. L. (2010). The Yakutat terrane: Dramatic change in crustal thickness across the Transition fault, Alaska. Geology, 38(10), 895-898.
19. Shillington, D. J., Bécel, A., Nedimović, M. R., Kuehn, H., Webb, S. C., Abers, G. A., ... & Mattei-Salicrup, G. A. (2015). Link between plate fabric, hydration and subduction zone seismicity in Alaska. Nature Geoscience, 8(12), 961-964.
20. Kopp, H., Kopp, C., Phipps Morgan, J., Flueh, E. R., Weinrebe, W., & Morgan, W. J. (2003). Fossil hot spot‐ridge interaction in the Musicians Seamount Province: Geophysical investigations of hot spot volcanism at volcanic elongated ridges. Journal of Geophysical Research: Solid Earth, 108(B3).
21. Xu, C., Dunn, R. A., Watts, A. B., Shillington, D. J., Grevemeyer, I., Gomez de la Pena, L., & Boston, B. B. (2022). A seismic tomography, gravity, and flexure study of the crust and upper mantle structure of the Emperor Seamounts at Jimmu guyot. Journal of Geophysical Research: Solid Earth, 127(6), e2021JB023241.
22. Fujie, G., Kodaira, S., Kaiho, Y., Yamamoto, Y., Takahashi, T., Miura, S., & Yamada, T. (2018). Controlling factor of incoming plate hydration at the north-western Pacific margin. Nature Communications, 9(1), 3844.
23. Fujie, G., Kodaira, S., Sato, T., & Takahashi, T. (2016). Along‐trench variations in the seismic structure of the incoming Pacific plate at the outer rise of the northern Japan Trench. Geophysical Research Letters, 43(2), 666-673.
24. Kodaira, S., Fujie, G., Yamashita, M., Sato, T., Takahashi, T., & Takahashi, N. (2014). Seismological evidence of mantle flow driving plate motions at a palaeo-spreading centre. Nature Geoscience, 7(5), 371-375.
25. Fujie, G., Kodaira, S., Nakamura, Y., Morgan, J. P., Dannowski, A., Thorwart, M., ... & Miura, S. (2020). Spatial variations of incoming sediments at the northeastern Japan arc and their implications for megathrust earthquakes. Geology, 48(6), 614-619.
26. Fujie, G., Kodaira, S., Obana, K., Yamamoto, Y., Isse, T., Yamada, T., ... & Miura, S. (2023). The nature of the Pacific plate as subduction inputs to the northeastern Japan arc and its implication for subduction zone processes. Progress in Earth and Planetary Science, 10(1), 50.
27. Ohira, A., Kodaira, S., Nakamura, Y., Fujie, G., Arai, R., & Miura, S. (2017). Structural variation of the oceanic Moho in the Pacific plate revealed by active-source seismic data. Earth and Planetary Science Letters, 476, 111-121.
28. Oikawa, M., Kaneda, K., & Nishizawa, A. (2010). Seismic structures of the 154–160 Ma oceanic crust and uppermost mantle in the Northwest Pacific Basin. Earth, Planets and Space, 62, e13-e16.
29. Kaneda, K., Kodaira, S., Nishizawa, A., Morishita, T., & Takahashi, N. (2010). Structural evolution of preexisting oceanic crust through intraplate igneous activities in the Marcus‐Wake seamount chain. Geochemistry, Geophysics, Geosystems, 11(10).
30. Contreras-Reyes, E., Grevemeyer, I., Watts, A. B., Planert, L., Flueh, E. R., & Peirce, C. (2010). Crustal intrusion beneath the Louisville hotspot track. Earth and Planetary Science Letters, 289(3-4), 323-333.
31. Holmes, R. C., Tolstoy, M., Cochran, J. R., & Floyd, J. S. (2008). Crustal thickness variations along the Southeast Indian Ridge (100–116 E) from 2‐D body wave tomography. Geochemistry, Geophysics, Geosystems, 9(12).
32. Grevemeyer, I., Flueh, E. R., Reichert, C., Bialas, J., Kläschen, D., & Kopp, C. (2001). Crustal architecture and deep structure of the Ninetyeast Ridge hotspot trail from active‐source ocean bottom seismology. Geophysical Journal International, 144(2), 414-431.
33. Collier, J. S., Minshull, T. A., Hammond, J. O., Whitmarsh, R. B., Kendall, J. M., Sansom, V., ... & Rumpker, G. (2009). Factors influencing magmatism during continental breakup: New insights from a wide‐angle seismic experiment across the conjugate Seychelles‐Indian margins. Journal of Geophysical Research: Solid Earth, 114(B3).
